# Supplementary material for: The Relationship Between Physical Exercise and Subjective Well-Being in College Students: The Mediating Effect of Body Image and Self-Esteem
Source: Front Psychol. 2021 May 28;12:658935. doi: 10.3389/fpsyg.2021.658935 (PMC8194825; doi:10.3389/fpsyg.2021.658935)
Supplement: Supplementary file 1 [file Table_1.XLSX]

## Sheet: Sheet1
index	totalseconds	Q1	Q2	Q3	Q4	Q5	Q6	Q7	Q8	Q9_选项1	Q9_选项2	Q9_选项3	Q9_选项4	Q9_选项5	Q9_选项6	Q9_选项7	Q9_选项8	Q9_选项9	Q9_选项10	Q9_选项11	Q10_行1	Q10反	Q11_行1	Q12_行1	Q12反	Q13_行1	Q14_行1	Q15_行1	Q15反	Q16_行1	Q16反	Q17_行1	Q18_行1	Q18反	Q19_行1	Q20_行1	Q20反	Q21_行1	Q22_行1	Q22反	Q23_行1	Q24_行1	Q24反	Q25_行1	Q25正	Q26_行1	Q27_行1	Q28	Q29
561	352	1	1	1	2	6	1	1	1	1	0	0	0	0	0	0	0	0	0	0	6	1	5	6	1	6	5	5	1	5	1	6	6	1	6	6	1	6	6	1	6	10	1	10	1	10	10	4	1
329	295	1	2	2	1	4	1	1	3	1	0	0	0	0	0	0	0	0	1	0	3	4	4	2	5	6	4	3	3	2	4	5	2	5	6	4	3	6	2	5	6	10	1	10	1	7	10	2	1
485	537	2	1	2	1	4	1	1	2	1	0	1	0	0	0	0	0	1	0	0	6	1	5	5	2	1	3	4	2	3	3	5	5	2	5	5	2	3	2	5	3	10	1	10	1	4	4	4	1
295	81	1	1	1	1	1	1	1	1	1	0	0	0	0	0	0	0	0	0	0	1	6	1	1	6	6	1	1	5	1	5	6	6	1	6	6	1	6	6	1	6	10	1	8	3	10	10	1	1
348	340	1	1	2	2	6	1	1	1	1	0	0	0	0	0	0	0	0	0	0	1	6	5	1	6	6	4	1	5	2	4	6	3	4	6	6	1	6	1	6	5	10	1	7	4	10	10	1	1
472	576	1	1	2	1	1	1	1	2	1	0	1	0	0	0	0	0	1	0	0	4	3	3	3	4	6	3	3	3	2	4	5	3	4	5	2	5	4	3	4	4	10	1	10	1	8	9	1	1
40	72	1	1	2	1	1	1	1	1	1	0	0	0	0	0	0	0	0	0	0	6	1	5	1	6	6	5	5	1	5	1	6	6	1	6	6	1	5	6	1	6	10	1	10	1	10	10	2	1
105	96	1	1	3	1	1	1	1	1	1	0	1	0	0	0	0	0	0	0	0	2	5	2	2	5	2	2	2	4	2	4	2	2	5	2	2	5	3	3	4	3	10	1	10	1	9	10	1	1
666	199	1	1	2	1	2	1	1	3	1	0	0	0	0	0	0	0	1	0	0	4	3	2	3	4	5	3	4	2	2	4	4	2	5	5	5	2	5	5	2	4	10	1	10	1	6	4	3	3
274	389	1	1	1	1	2	5	1	1	0	0	1	0	0	0	0	0	0	0	0	3	4	4	3	4	5	4	3	3	2	4	4	3	4	4	2	5	5	2	5	5	10	1	10	1	5	10	2	1
549	344	1	1	1	2	6	1	1	1	0	0	0	0	0	0	0	0	1	1	0	2	5	5	1	6	6	5	2	4	2	4	5	2	5	6	4	3	6	1	6	6	10	1	9	2	10	10	2	1
127	517	1	1	3	1	1	1	1	2	1	1	0	0	0	0	0	0	0	0	0	4	3	4	5	2	4	2	3	3	2	4	4	5	2	5	3	4	4	4	3	4	10	1	7	4	8	8	2	2
34	179	1	1	2	1	3	1	1	1	1	0	1	0	0	0	0	0	0	0	0	4	3	1	5	2	5	3	3	3	4	2	3	4	3	3	4	3	3	3	4	5	10	1	6	5	8	4	3	2
431	284	1	1	1	1	2	1	1	1	0	0	1	0	0	0	0	1	0	0	0	4	3	3	3	4	5	4	3	3	2	4	5	4	3	5	2	5	3	4	3	3	9	2	9	2	9	9	2	2
583	217	1	1	1	2	6	1	1	5	1	1	1	1	1	1	1	1	1	1	0	1	6	5	1	6	1	3	3	3	3	3	4	4	3	4	4	3	4	4	3	4	9	2	8	3	8	8	1	1
509	239	1	1	1	1	3	2	1	2	0	0	1	0	0	0	0	0	0	0	0	4	3	3	6	1	4	3	4	2	3	3	4	4	3	6	4	3	4	4	3	4	9	2	8	3	7	9	2	1
669	755	1	1	2	2	3	1	1	1	1	0	0	0	0	0	0	1	1	1	0	4	3	3	2	5	4	3	4	2	1	5	4	4	3	5	4	3	3	2	5	5	9	2	7	4	8	8	3	2
665	368	1	1	1	1	3	2	1	3	0	0	1	0	0	0	0	0	1	0	0	3	4	4	3	4	5	5	2	4	1	5	5	4	3	4	4	3	5	4	3	4	9	2	6	5	8	7	2	2
564	401	1	1	1	2	6	1	1	1	0	0	1	0	0	0	0	1	0	0	0	4	3	5	3	4	5	4	3	3	3	3	5	4	3	5	5	2	5	3	4	5	9	2	4	7	7	7	2	2
332	400	1	2	2	2	3	1	1	1	1	0	1	0	1	0	0	0	0	1	1	3	4	4	3	4	5	3	1	5	1	5	4	5	2	6	5	2	6	2	5	4	9	2	3	8	9	9	2	2
507	282	1	1	1	1	6	1	1	2	0	0	0	0	0	0	0	0	0	0	1	1	6	3	3	4	5	3	2	4	2	4	4	4	3	6	5	2	6	2	5	5	8	3	9	2	9	8	2	2
580	430	1	1	1	1	2	1	1	4	1	0	0	0	0	0	0	0	1	0	0	4	3	4	5	2	5	4	4	2	3	3	4	4	3	4	4	3	4	4	3	5	8	3	8	3	8	9	2	2
15	107	1	1	1	2	3	1	1	1	1	0	0	0	0	0	0	0	0	0	0	4	3	3	3	4	4	4	4	2	3	3	4	4	3	4	4	3	4	4	3	4	8	3	8	3	8	8	2	2
654	508	1	1	1	2	3	1	1	1	1	0	0	0	0	0	0	0	0	0	0	4	3	4	3	4	4	4	3	3	3	3	4	4	3	4	4	3	4	4	3	4	8	3	7	4	8	7	2	2
511	327	1	1	1	2	4	1	1	5	0	0	0	1	0	0	1	0	0	0	0	4	3	4	3	4	4	3	3	3	1	5	5	2	5	5	5	2	5	2	5	4	8	3	7	4	7	7	2	2
149	299	1	1	3	1	3	2	1	2	1	0	0	0	0	0	0	0	1	0	0	2	5	5	3	4	5	5	3	3	1	5	6	2	5	6	4	3	5	2	5	6	7	4	10	1	8	10	2	2
45	448	1	1	1	1	3	1	1	5	1	0	0	0	0	0	0	0	0	0	0	4	3	3	2	5	4	4	4	2	3	3	5	4	3	5	5	2	4	2	5	5	7	4	9	2	9	9	2	2
343	211	1	1	1	2	1	1	1	5	1	1	0	0	0	0	0	0	0	0	0	1	6	4	1	6	1	5	2	4	2	4	6	3	4	3	3	4	6	1	6	6	7	4	7	4	8	10	1	2
475	268	1	1	1	1	1	2	1	2	1	0	0	0	0	0	1	0	1	0	0	3	4	3	3	4	5	4	3	3	3	3	5	4	3	4	3	4	4	4	3	5	7	4	7	4	8	9	2	2
8	411	1	1	1	1	2	1	1	2	0	0	1	0	0	0	0	0	0	0	0	2	5	4	3	4	6	4	3	3	2	4	4	4	3	4	2	5	5	4	3	4	7	4	7	4	7	7	2	2
386	224	1	1	2	1	1	3	1	1	1	0	0	0	0	0	0	0	0	0	0	1	6	5	3	4	1	1	3	3	3	3	5	4	3	4	4	3	4	4	3	4	7	4	7	4	7	7	2	2
575	349	1	2	1	1	2	1	1	3	0	0	1	0	1	0	0	0	0	0	0	4	3	3	4	3	4	3	4	2	3	3	4	4	3	4	3	4	4	4	3	5	7	4	7	4	7	7	2	1
53	300	1	1	1	1	1	1	1	3	1	0	0	0	0	0	0	0	1	0	1	3	4	5	2	5	6	5	2	4	1	5	6	4	3	6	4	3	6	2	5	5	7	4	7	4	5	10	2	2
69	309	1	1	1	1	3	1	1	5	1	0	0	0	0	0	0	0	0	0	0	4	3	4	2	5	5	4	3	3	2	4	5	3	4	5	2	5	5	2	5	4	7	4	6	5	7	8	2	2
158	263	1	1	1	1	3	1	1	3	0	0	1	0	0	0	0	0	1	1	0	3	4	4	3	4	6	4	3	3	1	5	6	2	5	6	2	5	6	2	5	5	7	4	6	5	6	6	2	2
237	267	1	1	1	1	3	1	1	5	0	0	0	0	0	0	0	0	1	0	0	4	3	3	4	3	4	3	5	1	3	3	4	5	2	3	5	2	3	5	2	3	7	4	6	5	6	5	3	4
46	365	1	2	2	1	1	1	1	1	1	0	0	0	0	0	0	0	1	0	0	6	1	2	4	3	3	3	3	3	4	2	3	4	3	4	5	2	3	5	2	3	7	4	4	7	4	5	3	2
615	413	1	1	1	1	3	1	1	2	0	0	1	0	0	0	0	0	1	0	0	4	3	4	2	5	5	4	3	3	1	5	5	4	3	4	5	2	5	2	5	6	6	5	10	1	8	10	2	2
234	176	1	1	1	1	1	1	1	1	1	0	0	0	0	0	0	0	0	0	0	4	3	3	4	3	4	3	4	2	3	3	4	4	3	5	5	2	4	4	3	4	6	5	7	4	7	9	2	3
146	317	1	2	3	1	3	1	1	1	0	0	0	0	0	0	0	0	0	1	0	1	6	5	1	6	6	5	1	5	1	5	6	6	1	6	4	3	6	1	6	6	6	5	7	4	7	7	2	1
532	277	1	1	1	1	4	1	1	1	1	0	0	0	0	0	0	0	0	0	0	4	3	2	2	5	3	3	4	2	4	2	4	5	2	5	4	3	4	4	3	4	6	5	7	4	6	7	2	2
227	436	1	2	3	1	1	1	1	2	1	0	0	0	0	0	0	0	0	0	1	4	3	4	2	5	1	1	4	2	2	4	2	4	3	5	6	1	4	4	3	3	6	5	7	4	4	5	3	2
552	591	1	1	1	1	1	3	1	4	0	1	0	0	0	0	0	1	0	1	1	4	3	4	1	6	6	3	3	3	1	5	5	5	2	6	5	2	4	5	2	5	5	6	10	1	8	9	1	1
188	669	1	1	1	1	2	1	1	5	1	0	1	0	0	0	0	0	0	0	0	3	4	4	2	5	5	4	3	3	1	5	6	6	1	6	4	3	6	1	6	4	5	6	9	2	9	9	2	2
360	419	1	2	1	2	3	1	1	2	1	0	0	0	0	0	0	0	1	0	0	3	4	5	4	3	5	5	2	4	3	3	5	4	3	6	3	4	5	4	3	5	5	6	7	4	9	10	2	2
610	340	1	1	1	1	1	1	1	2	1	0	0	0	0	0	0	0	0	0	0	4	3	4	3	4	6	4	3	3	1	5	5	3	4	4	4	3	6	2	5	4	5	6	6	5	7	7	2	2
657	267	1	1	1	2	5	1	1	3	0	1	1	1	0	0	0	0	1	1	0	4	3	3	2	5	2	4	4	2	2	4	4	4	3	6	5	2	4	2	5	5	5	6	4	7	5	8	2	2
195	201	1	2	1	2	1	2	1	3	1	0	0	0	0	0	0	0	0	1	0	3	4	4	3	4	5	5	3	3	3	3	4	4	3	4	5	2	5	5	2	6	4	7	10	1	9	10	2	2
101	292	1	1	2	2	4	1	1	5	1	0	1	0	0	0	0	1	0	1	0	3	4	5	3	4	5	5	3	3	1	5	5	4	3	5	2	5	5	2	5	4	4	7	8	3	9	10	2	2
253	376	1	2	1	1	1	3	1	3	1	0	0	0	0	0	0	0	0	0	0	4	3	3	3	4	6	4	3	3	2	4	5	4	3	5	5	2	5	3	4	4	4	7	8	3	8	7	2	2
172	331	1	2	1	1	1	1	1	2	0	0	1	0	0	1	0	0	1	0	0	4	3	4	2	5	5	4	3	3	3	3	5	3	4	5	3	4	4	4	3	4	4	7	7	4	7	9	2	2
139	254	1	2	3	1	1	1	1	1	0	0	0	0	0	0	0	0	1	0	0	2	5	3	3	4	5	4	2	4	2	4	5	3	4	5	3	4	5	2	5	5	4	7	5	6	7	7	1	1
389	670	1	2	1	2	2	2	1	2	1	0	1	0	0	1	1	0	0	1	0	4	3	4	2	5	5	4	4	2	2	4	5	3	4	4	2	5	6	1	6	5	3	8	10	1	9	10	2	2
413	544	1	1	2	1	2	2	1	3	1	0	1	0	0	0	0	0	1	0	1	2	5	3	3	4	4	3	3	3	3	3	4	4	3	5	4	3	4	3	4	4	3	8	7	4	7	10	2	2
163	410	1	2	3	1	2	1	1	4	1	1	0	0	0	0	0	0	0	0	0	3	4	4	5	2	5	3	3	3	1	5	5	2	5	4	4	3	4	4	3	4	3	8	4	7	4	4	1	1
116	175	2	1	2	2	4	1	1	2	0	0	1	0	0	0	0	1	1	1	0	3	4	4	3	4	6	5	3	3	3	3	6	6	1	6	4	3	6	3	4	6	3	8	3	8	9	9	2	2
414	383	1	1	1	1	2	1	1	3	0	0	0	0	0	0	0	0	0	1	0	3	4	4	2	5	4	5	1	5	2	4	5	2	5	4	4	3	5	5	2	5	3	8	3	8	4	4	2	2
560	103	1	1	1	1	2	1	1	1	1	1	0	0	0	0	0	0	0	0	0	2	5	4	5	2	5	4	4	2	4	2	5	5	2	5	5	2	5	5	2	5	3	8	3	8	4	3	2	2
279	276	1	2	2	1	3	1	1	3	1	0	0	0	0	0	0	0	1	0	0	3	4	5	2	5	6	5	3	3	3	3	5	3	4	6	3	4	6	2	5	6	2	9	6	5	10	10	2	2
92	356	1	1	2	1	5	1	1	2	1	0	0	1	0	0	0	0	0	0	0	1	6	5	1	6	6	5	1	5	3	3	6	1	6	6	6	1	6	2	5	6	1	10	10	1	10	10	1	1
133	1652	1	1	2	1	1	5	1	4	0	1	1	0	1	1	0	1	0	1	0	2	5	4	1	6	4	3	3	3	3	3	4	5	2	5	4	3	5	2	5	5	1	10	10	1	10	10	1	2
233	376	1	2	1	1	2	1	1	2	0	0	1	0	1	0	1	1	1	1	0	3	4	3	3	4	6	4	3	3	1	5	4	2	5	6	2	5	6	2	5	5	1	10	10	1	10	10	1	1
484	268	1	2	1	1	6	3	1	3	1	0	0	0	0	0	0	1	0	0	0	1	6	5	1	6	6	5	1	5	1	5	6	2	5	6	1	6	6	1	6	6	1	10	10	1	10	10	1	1
119	546	1	1	2	1	3	1	1	1	0	0	1	0	0	0	0	0	0	0	0	3	4	5	1	6	4	2	1	5	2	4	4	3	4	5	2	5	5	2	5	4	1	10	10	1	10	10	2	3
277	449	1	2	1	1	1	1	1	2	1	0	0	0	0	0	0	0	0	0	0	2	5	5	3	4	6	5	2	4	1	5	6	3	4	6	4	3	6	2	5	6	1	10	10	1	9	10	2	2
49	561	1	1	3	1	4	1	1	3	1	0	1	0	0	0	0	0	0	0	0	3	4	5	2	5	5	5	2	4	1	5	5	2	5	6	3	4	5	2	5	5	1	10	10	1	9	10	1	1
557	308	1	1	1	1	1	1	1	1	1	0	0	0	0	0	0	0	0	0	0	4	3	3	2	5	5	3	3	3	2	4	5	2	5	6	5	2	5	2	5	4	1	10	10	1	8	10	2	2
304	545	1	2	3	2	3	1	1	2	1	0	1	0	0	0	0	0	1	0	0	3	4	5	2	5	5	4	3	3	1	5	5	4	3	6	4	3	5	3	4	5	1	10	10	1	8	9	2	1
190	328	1	1	1	1	2	2	1	2	1	0	0	0	0	0	0	0	0	0	0	2	5	5	1	6	6	5	3	3	1	5	6	6	1	6	1	6	6	2	5	6	1	10	10	1	6	8	1	1
618	273	1	1	1	1	4	1	1	2	1	0	0	0	0	0	0	0	0	0	1	4	3	4	3	4	4	4	3	3	1	5	5	4	3	5	4	3	5	3	4	5	1	10	8	3	8	8	2	2
585	303	1	1	1	2	3	2	1	5	1	0	1	0	0	0	1	0	0	1	0	4	3	4	3	4	5	3	4	2	2	4	5	5	2	6	4	3	5	2	5	4	1	10	8	3	7	8	2	2
79	470	2	1	2	2	4	1	1	5	1	0	0	0	0	0	0	0	0	0	0	2	5	5	2	5	6	4	5	1	1	5	4	5	2	6	5	2	4	2	5	5	1	10	8	3	5	6	2	1
97	240	1	1	2	1	2	1	1	1	1	0	1	0	0	0	0	0	0	0	0	2	5	4	1	6	5	4	1	5	1	5	6	2	5	6	2	5	6	1	6	5	1	10	7	4	9	10	1	1
378	392	1	1	1	2	2	1	1	3	0	0	1	0	0	0	0	0	1	0	0	3	4	4	2	5	5	3	4	2	2	4	5	5	2	4	5	2	6	5	2	4	1	10	6	5	6	4	2	2
538	365	1	1	1	1	1	1	1	2	1	0	1	0	0	0	0	0	1	1	0	2	5	3	3	4	4	5	3	3	3	3	4	4	3	6	5	2	5	5	2	5	1	10	5	6	9	8	2	2
318	297	1	2	2	1	1	1	1	1	1	0	0	0	1	0	0	0	1	0	0	3	4	4	3	4	6	4	3	3	2	4	4	4	3	6	2	5	5	2	5	2	1	10	5	6	8	10	2	2
144	702	1	2	3	2	1	1	1	1	0	0	1	0	0	0	1	0	0	1	0	3	4	4	2	5	4	3	3	3	3	3	4	4	3	6	3	4	4	3	4	4	1	10	5	6	5	8	1	1
223	603	1	2	1	1	1	1	1	1	1	0	0	0	0	0	0	0	0	0	0	2	5	4	4	3	5	5	4	2	2	4	5	3	4	6	4	3	5	2	5	4	1	10	4	7	7	4	2	2
28	509	1	2	1	2	6	1	1	5	1	0	0	0	0	0	0	0	1	1	0	4	3	2	5	2	4	1	5	1	5	1	6	5	2	4	5	2	2	4	3	1	1	10	3	8	2	2	3	2
308	272	1	1	2	1	2	2	1	2	1	0	1	1	1	0	0	0	1	1	0	3	4	1	1	6	1	2	1	5	4	2	1	3	4	6	1	6	2	3	4	1	1	10	1	10	10	10	1	1
124	183	1	1	3	1	3	2	1	1	1	1	0	0	0	0	0	0	0	0	0	1	6	5	1	6	1	1	1	5	1	5	6	1	6	6	1	6	6	1	6	5	1	10	1	10	9	10	1	1
184	670	1	1	1	1	2	4	1	2	0	0	1	0	0	0	0	0	0	0	0	4	3	3	3	4	4	3	3	3	2	4	4	5	2	5	4	3	5	5	2	5	1	10	1	10	9	5	2	2
125	93	1	1	2	1	1	1	1	1	0	0	0	0	0	0	0	0	0	0	1	1	6	1	1	6	1	1	1	5	1	5	1	1	6	1	1	6	1	1	6	1	1	10	1	10	1	1	1	1
168	63	1	1	1	2	1	1	1	1	1	0	0	0	0	0	1	0	0	0	0	1	6	1	1	6	1	1	1	5	1	5	1	1	6	1	1	6	1	1	6	1	1	10	1	10	1	1	1	1
342	127	1	1	2	1	1	1	1	1	1	0	0	0	0	0	0	0	0	0	0	4	3	1	1	6	1	1	5	1	1	5	1	4	3	1	6	1	1	6	1	1	1	10	1	10	1	1	4	4
529	256	1	1	1	1	5	1	2	1	0	0	1	0	0	0	0	0	0	0	0	4	3	5	3	4	6	5	3	3	3	3	6	6	1	6	6	1	6	6	1	6	10	1	10	1	10	10	2	2
186	197	1	2	1	2	2	1	2	1	1	0	0	0	0	0	0	0	0	0	0	3	4	3	3	4	5	3	3	3	2	4	4	4	3	6	5	2	5	4	3	4	8	3	8	3	8	7	3	3
55	172	1	1	2	1	1	1	2	1	1	0	0	0	0	0	0	0	1	0	0	3	4	3	3	4	3	3	3	3	3	3	4	4	3	3	3	4	4	4	3	4	8	3	8	3	7	7	3	1
129	457	1	1	2	1	5	1	2	1	0	0	0	0	0	0	0	0	1	1	0	3	4	4	3	4	5	4	3	3	2	4	5	6	1	6	3	4	5	4	3	4	7	4	7	4	9	10	1	1
122	471	1	1	3	1	4	1	2	1	1	0	0	1	0	0	0	0	0	0	0	1	6	4	1	6	5	5	3	3	1	5	5	2	5	6	4	3	6	1	6	6	5	6	9	2	8	10	2	1
323	340	1	1	3	1	1	1	2	1	1	0	0	0	0	0	0	0	0	0	0	3	4	3	3	4	6	5	2	4	1	5	5	4	3	5	2	5	6	2	5	5	1	10	10	1	10	10	2	2
29	361	1	2	2	1	2	1	2	1	1	0	0	0	0	0	0	0	0	0	0	4	3	4	3	4	6	3	3	3	1	5	4	4	3	6	4	3	5	3	4	4	1	10	7	4	10	10	1	1
230	171	1	2	3	1	1	1	3	1	0	0	1	0	1	0	0	0	1	0	0	2	5	5	2	5	6	5	5	1	5	1	6	6	1	6	6	1	6	6	1	6	10	1	10	1	10	10	2	1
667	188	1	1	2	2	2	1	2	2	0	0	1	0	0	0	0	0	0	0	0	4	3	3	5	2	4	3	4	2	2	4	4	4	3	4	4	3	4	4	3	4	10	1	10	1	5	6	2	2
282	143	1	1	1	1	2	1	2	2	1	0	0	0	0	0	0	0	0	0	0	2	5	5	1	6	6	3	3	3	3	3	6	1	6	6	2	5	6	2	5	5	10	1	8	3	8	8	1	1
216	242	1	2	2	2	4	1	2	2	1	0	0	0	0	0	0	0	0	0	0	3	4	4	4	3	3	3	3	3	3	3	4	4	3	4	4	3	4	4	3	4	9	2	9	2	9	9	3	3
504	256	1	2	1	1	6	1	2	2	1	1	1	0	0	0	0	0	1	0	0	5	2	3	4	3	4	3	3	3	3	3	3	3	4	4	4	3	4	4	3	4	9	2	8	3	9	9	3	2
394	428	1	2	2	1	1	1	3	1	1	0	0	0	0	0	0	0	1	0	0	3	4	4	3	4	4	4	4	2	2	4	6	3	4	5	2	5	6	2	5	6	9	2	7	4	7	7	3	2
438	294	1	1	1	2	6	1	2	2	1	0	0	0	0	0	0	1	0	0	0	3	4	4	5	2	5	4	3	3	2	4	4	4	3	6	5	2	5	5	2	6	9	2	5	6	5	4	2	2
299	359	1	1	2	2	2	1	2	2	1	0	0	0	1	0	0	1	0	1	0	3	4	3	3	4	4	4	4	2	2	4	4	4	3	4	3	4	4	4	3	4	8	3	9	2	6	8	2	2
175	105	1	1	1	1	1	1	2	2	1	0	0	0	0	0	0	0	0	0	0	4	3	3	4	3	4	3	3	3	3	3	3	5	2	5	4	3	4	4	3	4	8	3	8	3	8	8	3	3
142	245	1	2	3	1	1	1	2	2	1	0	0	0	0	0	0	0	0	0	0	3	4	4	3	4	4	3	4	2	2	4	5	2	5	5	3	4	4	3	4	5	8	3	6	5	8	9	2	2
81	469	1	1	2	1	2	1	2	2	1	1	1	0	0	0	0	0	1	1	1	1	6	4	2	5	5	5	1	5	1	5	6	2	5	6	2	5	6	2	5	6	7	4	10	1	9	10	1	1
570	278	1	1	1	1	2	1	2	2	1	0	1	0	0	0	0	0	0	0	0	3	4	4	3	4	5	4	3	3	2	4	5	2	5	6	2	5	5	2	5	5	7	4	10	1	9	9	2	1
325	818	1	1	2	1	1	1	2	2	0	0	1	0	0	0	0	0	1	0	0	3	4	4	2	5	5	4	3	3	3	3	5	2	5	6	4	3	6	3	4	5	7	4	10	1	8	10	1	2
224	186	1	1	1	1	4	1	2	2	0	0	0	0	0	0	1	0	0	0	0	4	3	5	3	4	6	2	3	3	3	3	5	4	3	6	3	4	4	4	3	4	7	4	7	4	7	7	2	2
246	285	1	1	1	1	1	1	2	2	1	0	1	0	0	0	0	0	1	0	0	4	3	3	5	2	4	4	4	2	4	2	4	4	3	6	4	3	4	5	2	4	7	4	7	4	7	7	3	3
135	567	1	2	3	2	1	1	3	1	1	0	0	0	0	0	0	1	1	1	0	3	4	4	2	5	4	3	2	4	1	5	4	4	3	6	6	1	4	5	2	3	7	4	5	6	6	6	2	2
138	234	1	1	2	1	2	1	2	2	1	0	0	0	0	0	0	0	0	0	0	4	3	4	4	3	4	3	4	2	2	4	4	5	2	4	4	3	5	4	3	5	6	5	6	5	8	8	1	2
625	435	1	1	1	1	3	1	2	2	1	0	0	0	0	0	0	0	1	0	0	3	4	4	3	4	5	4	3	3	2	4	5	2	5	6	4	3	5	2	5	4	5	6	9	2	8	7	2	2
174	296	1	1	2	1	1	1	2	2	1	0	0	0	0	0	0	0	0	0	0	3	4	4	3	4	5	5	3	3	3	3	4	3	4	6	5	2	6	5	2	5	5	6	7	4	8	9	2	2
337	314	1	2	2	1	4	1	2	2	0	0	0	0	0	0	0	1	1	1	0	4	3	4	3	4	5	3	4	2	2	4	5	4	3	5	5	2	5	5	2	5	5	6	7	4	7	7	2	2
93	301	1	1	2	1	2	1	2	2	1	1	0	0	0	0	0	0	0	0	0	4	3	3	4	3	5	3	3	3	3	3	4	4	3	4	5	2	5	5	2	5	5	6	5	6	6	6	1	2
426	214	1	1	2	1	1	1	2	2	1	0	0	0	0	0	1	1	1	0	0	3	4	3	3	4	2	2	3	3	2	4	4	4	3	4	4	3	4	4	3	3	5	6	5	6	6	6	2	2
354	177	1	1	1	1	3	1	2	2	1	0	0	0	0	0	0	0	1	0	0	2	5	4	1	6	4	3	3	3	3	3	4	4	3	4	4	3	4	4	3	4	4	7	10	1	9	8	1	1
297	260	1	1	2	2	2	1	2	2	1	0	1	0	0	0	0	0	1	0	0	3	4	3	3	4	3	3	3	3	3	3	4	4	3	4	4	3	5	3	4	5	4	7	8	3	8	10	2	2
140	246	1	2	3	1	2	1	2	2	1	0	0	0	1	1	0	0	1	0	0	2	5	5	1	6	6	5	3	3	1	5	6	2	5	6	1	6	6	6	1	5	2	9	10	1	10	10	2	2
528	183	1	1	1	1	2	1	2	2	1	0	0	0	0	0	0	0	1	0	0	4	3	3	5	2	4	3	4	2	2	4	4	3	4	4	4	3	4	4	3	4	2	9	7	4	7	7	2	2
280	720	1	1	1	2	2	1	2	2	1	0	0	0	0	0	0	0	0	0	0	3	4	4	3	4	4	4	2	4	2	4	5	1	6	6	3	4	4	2	5	5	1	10	10	1	10	10	2	2
454	342	1	1	3	2	2	1	3	1	1	0	1	0	0	0	0	0	1	0	0	2	5	5	3	4	6	5	1	5	1	5	6	6	1	6	6	1	6	6	1	6	1	10	10	1	10	10	1	1
464	179	1	2	2	2	1	1	2	2	1	0	0	0	0	0	0	0	0	0	0	3	4	3	3	4	6	5	2	4	1	5	6	1	6	6	1	6	6	2	5	6	1	10	10	1	10	10	1	1
493	400	1	2	1	1	6	1	2	2	1	0	0	0	0	0	0	0	0	0	0	2	5	4	3	4	5	5	3	3	1	5	5	2	5	6	2	5	5	1	6	5	1	10	10	1	10	10	2	2
58	302	1	2	2	1	2	1	2	2	1	0	0	0	0	0	0	0	0	0	0	4	3	3	2	5	6	5	1	5	1	5	5	2	5	5	2	5	6	1	6	6	1	10	10	1	10	10	1	1
553	502	1	1	1	1	3	1	2	2	1	0	1	0	0	0	0	0	1	1	0	1	6	5	1	6	6	5	1	5	2	4	5	2	5	6	2	5	5	2	5	5	1	10	10	1	8	10	2	1
461	426	1	1	3	1	1	1	2	2	0	0	1	0	0	0	0	0	0	0	0	3	4	4	4	3	6	4	3	3	2	4	6	3	4	5	4	3	6	1	6	4	1	10	9	2	9	9	2	2
506	312	1	1	1	1	2	1	2	2	0	0	1	0	0	0	0	0	1	1	0	1	6	5	2	5	6	5	1	5	1	5	6	1	6	6	2	5	6	1	6	6	1	10	8	3	10	10	1	1
324	243	2	2	2	2	2	1	2	2	1	0	0	0	0	0	0	0	1	0	0	1	6	5	1	6	6	5	1	5	1	5	6	1	6	6	1	6	6	1	6	6	1	10	7	4	10	10	1	1
212	654	1	1	1	1	1	1	2	2	1	0	0	0	0	0	0	0	1	0	0	3	4	4	1	6	6	5	1	5	2	4	5	2	5	6	3	4	5	2	5	4	1	10	7	4	8	10	1	1
327	493	1	2	2	1	2	1	2	2	0	0	1	0	0	0	1	0	1	1	0	3	4	3	3	4	4	4	3	3	2	4	4	3	4	5	4	3	4	2	5	4	1	10	7	4	7	9	2	2
401	359	1	1	1	2	3	1	2	2	1	0	1	1	0	0	0	0	0	0	0	4	3	4	4	3	4	4	3	3	2	4	4	4	3	5	4	3	4	5	2	4	1	10	7	4	6	8	2	2
226	130	1	1	2	1	2	1	2	2	1	1	0	0	0	0	0	0	0	0	0	2	5	2	2	5	1	3	1	5	2	4	3	2	5	4	3	4	3	3	4	3	1	10	6	5	7	10	1	1
235	388	1	2	1	1	2	1	2	3	1	0	0	0	0	0	0	0	1	0	0	3	4	3	3	4	4	3	3	3	1	5	5	4	3	6	4	3	5	1	6	5	10	1	10	1	8	10	2	2
465	287	1	1	3	1	2	1	2	3	1	0	0	0	1	0	0	1	0	0	0	4	3	3	3	4	4	3	3	3	2	4	4	4	3	4	4	3	4	4	3	4	10	1	7	4	5	6	3	2
536	234	1	1	1	2	3	1	2	3	1	0	0	0	0	0	0	0	1	0	0	3	4	5	2	5	5	4	2	4	2	4	5	4	3	6	2	5	6	2	5	5	10	1	10	1	9	10	2	2
633	745	1	1	1	1	3	1	2	3	1	0	1	0	0	0	0	0	1	0	0	2	5	3	3	4	5	4	3	3	2	4	4	3	4	6	4	3	4	3	4	6	10	1	10	1	9	10	2	2
164	2380	1	1	1	1	2	1	2	3	1	0	1	0	0	0	0	0	1	0	0	3	4	5	2	5	6	5	3	3	1	5	5	1	6	6	2	5	6	1	6	5	10	1	10	1	8	10	2	2
468	233	1	1	1	1	1	1	2	3	1	0	0	0	0	0	0	0	1	0	1	1	6	5	3	4	5	5	3	3	3	3	5	6	1	6	4	3	4	4	3	5	10	1	9	2	9	9	2	1
457	234	1	1	1	1	2	1	2	3	1	0	0	0	0	0	0	0	1	0	0	4	3	4	5	2	5	4	4	2	3	3	5	5	2	4	4	3	4	5	2	5	9	2	8	3	8	8	2	2
249	105	1	1	3	1	2	1	2	3	1	0	0	0	0	0	0	0	0	0	0	3	4	4	3	4	3	3	3	3	3	3	4	4	3	4	4	3	4	4	3	4	8	3	9	2	8	8	2	2
554	143	1	1	1	1	2	1	4	1	1	0	0	0	0	0	0	0	0	0	0	3	4	5	2	5	3	3	3	3	3	3	5	4	3	4	4	3	4	4	3	4	8	3	8	3	8	8	1	2
559	488	1	2	1	2	3	1	2	3	0	0	1	0	0	0	0	0	0	1	0	5	2	2	4	3	4	2	4	2	2	4	2	4	3	4	5	2	4	5	2	3	8	3	8	3	5	8	3	2
283	284	1	1	1	1	2	1	2	3	1	0	0	0	0	0	0	0	1	0	0	3	4	5	2	5	5	5	1	5	1	5	6	1	6	6	5	2	6	6	1	6	7	4	10	1	8	10	1	1
473	512	1	1	2	1	3	1	2	3	1	0	1	0	0	0	0	1	0	1	0	4	3	4	3	4	5	4	4	2	2	4	4	4	3	6	5	2	6	4	3	6	7	4	10	1	8	8	2	2
661	402	1	1	1	1	2	1	2	3	1	1	0	0	0	0	0	0	1	0	0	3	4	4	2	5	5	3	4	2	2	4	4	2	5	6	4	3	5	2	5	5	7	4	7	4	9	5	2	2
353	343	1	1	1	1	2	1	2	3	1	0	0	0	0	0	1	0	0	0	0	3	4	3	3	4	5	3	4	2	3	3	4	3	4	5	3	4	5	3	4	4	7	4	7	4	8	9	2	2
328	230	1	2	2	1	6	1	2	3	0	0	1	0	0	0	0	0	1	1	0	4	3	2	3	4	3	3	4	2	3	3	3	4	3	3	4	3	4	3	4	4	7	4	7	4	7	8	3	3
301	380	1	2	2	2	2	1	2	3	1	0	0	0	0	0	0	1	0	0	0	3	4	4	3	4	5	4	3	3	2	4	4	4	3	5	4	3	4	4	3	4	7	4	7	4	7	7	2	2
638	199	1	1	1	1	2	1	2	3	1	0	0	0	1	0	0	0	0	0	0	3	4	3	3	4	6	5	3	3	1	5	4	4	3	4	4	3	4	4	3	4	7	4	7	4	7	7	2	2
623	331	1	1	1	1	1	1	2	3	1	0	0	0	0	0	0	1	1	0	0	3	4	4	3	4	5	3	3	3	1	5	4	5	2	5	4	3	4	3	4	4	6	5	10	1	7	9	2	2
290	353	1	1	1	1	2	1	2	3	1	0	0	0	0	0	0	0	1	0	0	4	3	3	3	4	4	4	4	2	2	4	5	5	2	6	4	3	5	2	5	5	6	5	6	5	7	6	2	3
60	115	1	1	2	1	2	3	2	1	0	0	1	0	0	0	0	0	0	0	0	4	3	3	4	3	4	3	3	3	3	3	4	4	3	4	4	3	3	6	1	6	5	6	7	4	8	10	1	1
415	530	1	1	1	2	4	1	2	3	1	0	0	1	0	0	0	0	1	1	0	3	4	4	3	4	5	2	3	3	2	4	5	2	5	5	4	3	5	2	5	5	3	8	8	3	8	8	2	2
482	326	1	2	1	2	2	1	2	3	1	0	0	0	0	1	0	0	0	1	0	3	4	4	5	2	4	3	3	3	2	4	5	4	3	6	4	3	5	4	3	4	2	9	6	5	6	6	2	2
429	2592	1	2	1	2	2	1	2	3	1	0	0	0	0	0	0	0	0	0	0	2	5	1	1	6	1	1	1	5	1	5	1	1	6	1	1	6	1	1	6	1	2	9	1	10	1	5	1	1
65	384	1	2	2	1	3	1	2	3	1	0	0	0	0	0	0	0	0	0	0	2	5	4	3	4	5	4	2	4	1	5	5	3	4	6	2	5	5	2	5	4	1	10	10	1	10	10	2	2
180	341	1	1	2	1	1	1	2	3	1	0	0	0	0	0	0	0	0	0	1	2	5	4	2	5	6	5	1	5	1	5	6	1	6	6	6	1	6	6	1	6	1	10	10	1	10	10	1	1
72	508	1	1	2	1	3	1	2	3	0	0	1	0	0	0	0	0	1	1	0	3	4	5	3	4	5	4	3	3	2	4	4	3	4	6	4	3	5	2	5	5	1	10	9	2	8	9	2	2
480	587	1	1	1	2	3	1	2	3	1	0	1	0	0	0	0	0	0	0	0	3	4	5	2	5	5	4	3	3	2	4	5	2	5	5	4	3	4	4	3	4	1	10	8	3	7	8	2	2
499	361	1	2	1	2	4	1	2	3	1	1	1	0	0	0	0	0	0	0	0	3	4	4	2	5	6	4	1	5	1	5	6	2	5	6	2	5	6	1	6	6	1	10	7	4	10	10	2	2
201	416	1	1	1	1	2	1	2	3	1	0	0	1	0	0	0	0	1	0	0	2	5	4	3	4	5	3	3	3	2	4	5	2	5	6	3	4	4	2	5	5	1	10	7	4	10	9	2	2
365	356	1	1	1	2	3	1	2	3	1	0	1	0	0	0	0	0	0	0	0	2	5	4	3	4	5	4	3	3	2	4	5	3	4	5	4	3	5	4	3	5	1	10	7	4	9	9	2	1
151	336	1	2	3	1	3	1	2	3	1	0	0	0	1	1	0	0	0	0	0	3	4	3	3	4	5	3	4	2	3	3	4	3	4	5	4	3	4	4	3	4	1	10	1	10	7	8	2	2
259	455	1	2	1	1	1	2	3	1	1	1	1	0	0	0	0	0	1	0	0	4	3	5	4	3	6	5	1	5	2	4	5	4	3	6	1	6	6	1	6	6	10	1	7	4	9	6	1	1
441	386	1	1	1	1	3	2	2	2	0	0	1	0	0	0	0	0	0	0	0	3	4	3	3	4	5	4	4	2	2	4	4	5	2	6	4	3	5	5	2	5	10	1	10	1	9	10	2	2
83	314	1	1	2	1	1	2	2	2	1	0	0	0	0	0	0	0	0	0	0	4	3	4	1	6	5	4	3	3	4	2	5	5	2	5	4	3	5	5	2	5	10	1	10	1	9	10	2	2
260	556	1	2	1	1	2	1	3	2	1	1	1	0	0	0	0	0	0	0	0	3	4	3	3	4	4	4	3	3	2	4	4	3	4	3	3	4	5	3	4	5	10	1	7	4	8	9	2	1
605	297	1	1	1	1	1	1	2	4	1	0	1	0	0	0	0	0	0	0	0	5	2	3	5	2	5	3	3	3	3	3	4	4	3	4	4	3	3	3	4	3	10	1	7	4	7	7	2	2
435	1508	1	2	1	2	4	1	2	4	1	0	1	0	0	0	0	0	1	1	0	3	4	4	2	5	5	4	2	4	2	4	5	2	5	6	2	5	5	2	5	5	10	1	3	8	8	10	2	2
200	108	1	1	1	1	1	1	3	2	1	0	0	0	0	0	0	0	1	0	0	3	4	4	3	4	4	4	3	3	3	3	4	4	3	4	3	4	4	3	4	4	9	2	7	4	8	7	2	2
87	190	1	1	2	1	2	2	2	2	0	1	0	0	1	0	0	0	0	0	0	3	4	4	3	4	5	4	3	3	3	3	5	5	2	6	5	2	5	5	2	5	8	3	8	3	8	9	2	2
303	419	1	2	2	1	2	1	3	2	0	0	0	0	1	0	0	0	0	0	0	3	4	4	4	3	5	4	3	3	3	3	4	4	3	5	5	2	4	4	3	4	8	3	8	3	8	9	3	2
501	241	1	2	2	1	4	1	2	4	0	0	0	0	0	0	0	0	1	1	0	4	3	3	4	3	4	3	4	2	4	2	4	4	3	4	6	1	5	5	2	4	8	3	5	6	7	8	3	2
316	324	1	2	2	2	5	1	3	2	0	0	1	0	0	0	0	0	0	0	0	4	3	3	1	6	4	2	4	2	1	5	4	4	3	4	4	3	4	3	4	4	8	3	5	6	6	7	2	2
47	300	1	2	1	1	3	1	2	4	1	0	0	0	0	0	0	0	0	1	0	1	6	4	3	4	6	4	1	5	1	5	5	4	3	6	2	5	6	2	5	5	7	4	10	1	8	10	1	2
496	646	1	1	1	2	1	2	2	2	0	0	0	0	0	0	0	0	1	0	0	4	3	4	3	4	4	4	4	2	2	4	5	3	4	6	3	4	5	3	4	5	7	4	9	2	7	7	2	2
126	349	1	1	1	1	2	1	3	2	0	0	1	0	0	0	0	0	0	0	0	4	3	4	5	2	5	4	3	3	2	4	4	3	4	6	5	2	5	5	2	4	7	4	8	3	9	9	2	2
573	100	1	1	1	2	4	2	2	2	0	0	1	0	0	0	0	0	0	0	0	3	4	4	3	4	3	3	3	3	3	3	4	4	3	4	4	3	4	4	3	4	7	4	7	4	9	7	2	1
157	398	1	1	2	1	6	1	3	2	0	0	1	0	0	0	0	0	0	0	0	2	5	5	1	6	6	5	2	4	1	5	6	5	2	6	2	5	6	1	6	4	7	4	7	4	8	10	1	1
74	478	1	1	2	1	2	1	3	2	1	0	0	0	0	0	0	0	1	0	0	4	3	3	4	3	4	3	4	2	4	2	4	4	3	5	4	3	5	4	3	5	7	4	7	4	7	7	2	2
181	282	1	1	1	2	4	1	3	2	0	1	0	0	0	0	0	0	0	0	0	4	3	3	3	4	3	4	2	4	2	4	5	5	2	5	5	2	5	5	2	5	7	4	7	4	7	7	2	1
285	168	1	2	1	2	3	2	2	2	1	0	0	0	0	0	0	0	1	1	0	5	2	3	4	3	4	3	4	2	2	4	4	4	3	4	5	2	4	4	3	4	7	4	7	4	7	7	2	2
339	226	1	2	2	2	4	1	3	2	0	0	0	0	0	1	0	0	1	0	0	3	4	3	3	4	3	3	3	3	3	3	4	3	4	3	4	3	4	4	3	4	7	4	7	4	7	7	2	2
612	255	1	1	1	1	1	1	2	4	1	0	0	0	0	0	0	0	0	0	0	4	3	3	2	5	5	5	3	3	1	5	5	3	4	5	4	3	5	2	5	5	7	4	7	4	7	7	2	2
32	474	1	2	1	1	1	1	3	2	0	0	1	0	0	1	1	1	1	1	0	4	3	4	3	4	4	3	4	2	2	4	4	5	2	6	4	3	4	4	3	3	7	4	5	6	5	6	3	2
67	515	1	2	2	1	1	4	2	1	0	1	0	0	0	0	0	0	1	0	0	4	3	3	3	4	2	1	4	2	3	3	4	3	4	4	5	2	4	2	5	3	7	4	5	6	5	6	2	2
267	425	1	2	2	1	3	2	2	2	1	0	0	0	0	0	0	0	1	0	0	4	3	3	3	4	5	4	1	5	2	4	5	3	4	3	5	2	4	3	4	4	6	5	10	1	8	9	2	2
645	244	1	1	1	2	2	2	2	2	1	0	1	0	0	0	0	0	0	0	0	3	4	4	3	4	5	4	3	3	2	4	5	3	4	6	5	2	6	2	5	5	5	6	10	1	8	10	2	2
565	324	1	1	1	2	3	1	2	4	0	0	1	0	0	0	0	0	0	1	0	1	6	5	1	6	6	4	1	5	1	5	6	4	3	6	5	2	4	2	5	3	4	7	7	4	7	7	1	1
434	276	1	1	1	2	6	1	2	4	0	0	0	0	0	0	0	0	1	0	0	3	4	4	2	5	5	3	3	3	1	5	5	6	1	6	3	4	5	1	6	5	3	8	10	1	9	10	2	1
550	620	1	1	1	1	1	1	2	4	1	1	0	0	0	0	0	0	1	0	0	3	4	5	3	4	5	5	3	3	1	5	6	2	5	6	2	5	6	2	5	5	3	8	7	4	9	10	2	2
241	271	1	1	2	1	2	1	2	4	1	0	0	0	1	0	0	0	0	0	0	3	4	3	3	4	3	3	3	3	3	3	4	4	3	4	4	3	4	4	3	4	2	9	9	2	8	9	1	1
611	272	1	1	1	2	4	1	2	4	1	0	1	0	0	0	0	0	0	0	0	2	5	4	6	1	6	5	1	5	1	5	6	4	3	6	2	5	6	2	5	5	1	10	10	1	10	10	1	2
663	362	1	1	2	2	6	1	3	2	0	0	0	1	0	0	0	0	0	1	0	1	6	4	2	5	6	5	3	3	1	5	6	1	6	6	2	5	6	1	6	4	1	10	10	1	10	10	2	1
451	496	1	1	1	1	2	1	2	4	1	0	0	0	0	0	1	1	0	0	0	4	3	5	2	5	5	4	3	3	2	4	5	5	2	6	6	1	6	3	4	4	1	10	10	1	7	7	2	2
25	718	1	1	2	2	2	1	3	2	0	1	1	0	0	0	0	0	0	0	0	3	4	4	2	5	5	3	3	3	3	3	4	3	4	6	3	4	5	3	4	4	1	10	7	4	10	10	1	1
176	501	1	2	1	1	4	1	2	4	1	0	1	0	0	0	0	0	1	0	0	3	4	4	2	5	6	4	3	3	1	5	5	4	3	6	4	3	6	2	5	6	1	10	7	4	9	10	2	2
99	366	1	1	2	1	2	1	2	4	1	0	1	0	0	0	0	0	0	1	0	2	5	4	3	4	5	4	2	4	1	5	5	3	4	6	3	4	6	1	6	5	1	10	7	4	9	9	2	2
477	700	1	2	1	1	1	1	2	5	1	0	0	1	0	1	0	0	1	0	1	5	2	2	2	5	2	1	4	2	4	2	3	4	3	5	6	1	2	5	2	3	7	4	9	2	5	4	3	3
120	2514	1	1	2	2	3	1	2	5	1	0	0	0	0	0	1	0	0	0	0	1	6	4	2	5	4	3	4	2	1	5	4	5	2	6	3	4	5	5	2	5	7	4	7	4	7	8	3	2
169	254	1	2	3	1	3	1	2	5	1	0	0	0	0	0	0	0	0	1	0	3	4	3	3	4	4	4	3	3	3	3	5	4	3	4	4	3	5	2	5	4	7	4	7	4	7	7	2	2
593	435	1	2	1	1	2	1	2	5	1	0	0	0	0	0	0	0	1	0	0	3	4	3	4	3	5	4	3	3	2	4	4	4	3	5	5	2	5	5	2	5	7	4	7	4	7	7	2	2
205	199	1	2	1	2	1	1	2	5	0	0	0	0	0	0	0	1	0	1	0	4	3	3	3	4	5	5	3	3	1	5	5	4	3	6	4	3	4	4	3	4	7	4	7	4	6	8	2	2
256	458	1	2	1	1	2	1	2	5	0	0	1	0	0	0	0	0	0	0	0	3	4	3	3	4	5	3	4	2	1	5	4	4	3	5	5	2	5	3	4	4	6	5	7	4	7	7	3	2
232	562	1	1	1	1	2	1	2	5	1	0	1	0	0	0	0	0	1	0	0	2	5	4	3	4	5	4	3	3	2	4	5	2	5	5	2	5	5	2	5	5	2	9	10	1	10	9	2	2
382	426	1	2	2	1	2	1	2	5	1	0	0	0	0	0	0	0	0	0	0	3	4	4	3	4	6	5	1	5	1	5	5	4	3	6	5	2	6	1	6	6	1	10	10	1	10	10	2	2
359	239	1	1	1	1	2	1	2	5	1	0	0	0	0	0	0	0	0	0	0	5	2	3	3	4	5	4	4	2	2	4	4	3	4	6	5	2	5	5	2	5	1	10	10	1	5	8	2	2
312	581	1	2	2	1	1	1	2	5	1	0	1	0	1	0	0	0	0	1	0	3	4	4	3	4	6	4	1	5	2	4	5	5	2	5	5	2	5	2	5	5	1	10	9	2	9	9	2	2
393	607	1	1	1	1	1	1	2	5	0	0	1	0	0	0	0	0	0	0	0	3	4	4	4	3	5	4	3	3	2	4	4	3	4	6	2	5	6	3	4	3	1	10	7	4	9	9	2	2
456	5524	1	1	1	1	1	1	3	3	0	0	0	1	0	0	0	0	0	0	0	4	3	4	3	4	5	4	4	2	2	4	5	2	5	6	6	1	6	2	5	5	10	1	8	3	7	7	2	2
419	438	1	2	1	1	2	1	3	3	1	0	0	0	0	0	0	0	0	0	0	2	5	4	2	5	5	4	3	3	2	4	5	4	3	5	3	4	5	2	5	5	10	1	8	3	8	10	2	1
432	3409	1	1	1	1	2	2	2	3	0	0	0	0	0	0	0	0	0	0	1	3	4	4	3	4	5	4	4	2	4	2	5	5	2	5	5	2	5	5	2	5	10	1	7	4	7	7	2	2
558	488	1	1	1	1	2	1	3	3	1	0	1	0	0	0	0	0	0	0	0	3	4	3	4	3	5	3	3	3	2	4	4	4	3	2	2	5	5	3	4	6	10	1	7	4	7	7	2	2
196	502	1	2	1	1	1	1	3	3	1	1	1	0	1	0	0	1	1	1	0	3	4	3	4	3	5	3	3	3	3	3	5	4	3	5	2	5	5	2	5	5	9	2	10	1	9	10	2	2
600	101	1	1	1	2	1	2	2	3	0	1	0	0	0	0	1	0	1	0	0	3	4	4	3	4	4	3	2	4	4	2	4	3	4	5	3	4	5	3	4	5	9	2	8	3	7	8	1	1
3	219	1	2	2	1	1	1	3	3	1	0	0	0	0	0	0	0	1	1	0	3	4	3	3	4	5	3	3	3	3	3	4	3	4	5	3	4	4	3	4	4	9	2	7	4	7	7	2	2
264	92	1	1	1	1	2	1	3	3	1	0	1	0	0	0	0	0	0	0	0	4	3	3	4	3	4	3	3	3	3	3	3	4	3	3	4	3	4	4	3	4	8	3	9	2	8	9	2	2
542	94	1	1	2	1	3	1	3	3	1	0	0	0	1	0	0	0	0	0	0	3	4	3	3	4	3	3	3	3	3	3	4	4	3	4	4	3	4	4	3	4	8	3	9	2	8	8	2	2
392	370	1	1	2	1	1	2	2	3	1	0	0	0	1	0	0	0	0	1	0	3	4	5	2	5	6	4	2	4	1	5	5	3	4	5	2	5	5	2	5	6	8	3	8	3	9	10	2	2
63	222	1	1	2	2	5	2	2	3	1	1	1	0	1	0	0	0	0	0	0	4	3	3	2	5	2	1	4	2	2	4	1	1	6	2	2	5	2	2	5	2	8	3	8	3	8	8	1	2
584	374	1	1	1	1	3	3	2	2	1	0	0	0	0	0	0	0	0	0	0	4	3	4	3	4	5	4	4	2	2	4	4	2	5	6	3	4	6	6	1	5	8	3	7	4	7	7	2	2
296	93	1	1	2	1	1	3	3	1	1	0	1	0	1	0	0	0	0	0	0	1	6	1	1	6	1	1	1	5	1	5	5	1	6	1	1	6	1	1	6	1	8	3	5	6	5	5	1	1
215	373	1	1	2	1	1	1	3	3	1	0	1	0	0	0	0	0	1	1	0	3	4	5	1	6	6	5	3	3	1	5	6	2	5	6	2	5	6	1	6	6	7	4	10	1	8	10	1	2
314	363	2	2	2	2	5	1	3	3	1	0	1	0	0	0	1	1	0	1	0	3	4	4	3	4	5	4	3	3	3	3	4	4	3	6	4	3	5	3	4	4	7	4	10	1	6	7	2	2
37	262	1	1	2	1	2	1	3	3	1	0	0	0	0	0	0	0	0	0	0	3	4	5	2	5	6	5	3	3	1	5	6	2	5	6	5	2	5	2	5	6	7	4	7	4	8	9	2	2
198	257	1	1	1	1	2	1	3	3	0	0	1	0	0	0	0	1	1	0	0	3	4	5	4	3	5	5	1	5	1	5	5	4	3	6	2	5	6	1	6	5	7	4	7	4	7	7	1	1
338	127	1	1	3	1	3	2	2	3	1	0	1	0	0	0	0	0	1	1	0	2	5	4	2	5	5	4	4	2	2	4	5	5	2	5	5	2	5	5	2	5	6	5	6	5	7	7	2	2
322	140	1	2	2	2	4	1	3	3	0	1	1	0	0	0	0	0	0	0	0	2	5	4	3	4	3	3	3	3	3	3	3	4	3	3	3	4	3	3	4	3	6	5	6	5	5	6	1	1
9	284	1	1	2	1	2	1	3	3	1	0	0	0	0	0	0	0	1	1	0	3	4	5	3	4	4	3	3	3	3	3	6	4	3	5	3	4	5	5	2	5	5	6	9	2	9	10	3	2
662	362	1	2	1	1	3	2	2	3	1	0	1	0	1	0	0	0	0	1	0	3	4	4	3	4	4	5	3	3	2	4	5	3	4	5	4	3	6	3	4	5	5	6	8	3	8	10	2	2
487	344	1	1	1	1	2	2	2	3	1	0	0	0	0	0	0	0	1	0	0	3	4	4	3	4	5	3	3	3	2	4	4	5	2	5	5	2	4	5	2	5	5	6	7	4	7	7	2	2
602	215	1	1	1	2	6	1	3	3	0	0	0	0	0	0	0	1	1	0	0	2	5	5	2	5	6	4	1	5	2	4	6	1	6	6	1	6	5	1	6	6	4	7	10	1	8	10	2	2
421	463	1	1	1	1	2	2	2	3	1	0	1	0	0	0	0	0	1	0	0	3	4	4	3	4	5	4	3	3	2	4	5	4	3	5	4	3	5	3	4	4	4	7	9	2	9	10	2	2
242	332	1	1	1	1	1	2	2	3	1	0	0	0	0	0	0	0	0	0	0	3	4	4	2	5	4	4	1	5	2	4	4	3	4	5	5	2	5	5	2	5	4	7	9	2	9	9	3	2
255	332	1	2	1	1	1	1	3	3	0	0	1	0	0	1	0	1	1	0	0	1	6	4	2	5	5	4	1	5	2	4	5	2	5	5	2	5	5	1	6	5	4	7	7	4	10	10	2	2
488	436	1	2	1	1	5	1	3	3	1	0	0	0	0	0	0	0	1	1	0	3	4	4	2	5	5	4	2	4	3	3	5	5	2	5	3	4	5	3	4	5	3	8	9	2	7	7	2	2
530	2995	1	1	1	1	2	1	3	3	1	0	0	0	0	0	0	0	0	1	0	3	4	4	3	4	4	3	3	3	3	3	4	4	3	4	4	3	4	2	5	4	3	8	7	4	9	9	2	2
368	366	1	2	1	1	1	1	4	2	1	0	0	0	0	0	0	0	0	0	0	4	3	3	3	4	4	4	3	3	3	3	4	3	4	5	5	2	5	5	2	6	3	8	7	4	7	7	2	1
330	167	1	1	2	2	4	1	4	2	1	1	0	0	0	0	0	0	0	0	0	1	6	5	2	5	6	5	1	5	1	5	6	2	5	6	2	5	6	2	5	5	2	9	10	1	10	10	1	1
193	568	1	2	1	2	3	2	2	3	1	0	1	0	0	0	0	0	1	0	0	2	5	4	2	5	4	5	2	4	1	5	6	3	4	6	4	3	6	2	5	5	2	9	10	1	8	10	2	2
71	340	1	1	2	1	2	2	2	3	1	0	0	1	1	0	1	0	0	0	0	4	3	4	3	4	5	3	3	3	2	4	5	5	2	5	4	3	4	4	3	4	2	9	2	9	8	9	2	2
107	601	1	1	2	2	4	1	3	3	1	0	0	0	0	0	0	0	1	0	0	1	6	5	1	6	6	5	1	5	1	5	6	1	6	6	1	6	6	1	6	6	1	10	10	1	10	10	1	1
257	276	1	2	1	2	4	1	3	3	0	0	1	0	1	0	0	0	0	0	0	1	6	5	1	6	6	5	1	5	1	5	6	6	1	6	3	4	5	3	4	5	1	10	10	1	10	10	1	1
448	182	2	1	1	2	4	3	3	1	1	1	1	1	1	1	1	1	1	1	0	1	6	1	1	6	1	1	1	5	1	5	1	1	6	1	1	6	1	1	6	1	1	10	10	1	10	10	1	1
275	1093	1	2	1	1	4	2	2	3	1	0	1	0	0	0	0	0	0	1	0	2	5	5	1	6	6	5	1	5	1	5	6	2	5	6	2	5	6	1	6	5	1	10	10	1	10	10	1	1
423	375	1	2	1	2	5	1	4	2	1	1	0	0	0	0	0	0	1	1	0	3	4	5	3	4	6	4	1	5	2	4	5	6	1	4	4	3	5	2	5	4	1	10	10	1	10	10	2	2
202	405	1	1	2	1	2	1	3	3	1	1	1	0	0	0	0	0	1	0	0	2	5	5	3	4	5	5	3	3	1	5	5	2	5	4	5	2	5	2	5	5	1	10	10	1	10	8	2	2
373	421	1	1	1	2	4	3	2	2	0	0	1	0	0	0	0	0	0	0	0	3	4	3	5	2	5	4	3	3	2	4	5	3	4	6	5	2	5	3	4	5	1	10	10	1	9	9	2	3
82	393	1	1	2	1	1	1	3	3	1	0	1	0	0	0	0	0	1	0	0	3	4	4	3	4	5	4	3	3	2	4	5	4	3	6	4	3	6	2	5	6	1	10	10	1	9	10	2	2
622	641	1	1	1	1	1	1	3	3	1	1	1	0	0	0	0	0	0	0	0	3	4	5	2	5	5	4	2	4	1	5	5	4	3	5	2	5	5	2	5	4	1	10	10	1	9	10	2	2
27	327	1	1	1	1	1	1	3	3	1	1	0	0	1	0	0	0	0	0	0	1	6	5	1	6	6	5	3	3	1	5	6	6	1	6	4	3	6	6	1	6	1	10	8	3	10	10	2	2
527	105	1	1	1	1	2	1	3	3	0	0	1	0	0	0	0	0	1	1	0	1	6	5	3	4	3	3	3	3	3	3	5	6	1	6	6	1	6	6	1	6	1	10	8	3	8	8	1	2
236	236	1	1	1	2	3	2	2	3	1	0	0	0	0	0	1	0	0	0	0	3	4	5	3	4	6	5	3	3	1	5	6	4	3	6	4	3	6	1	6	6	1	10	7	4	10	10	2	2
646	354	1	1	1	1	3	1	3	3	1	0	1	0	0	0	0	0	1	0	0	3	4	4	3	4	6	4	2	4	3	3	5	4	3	6	3	4	5	2	5	5	1	10	7	4	8	8	1	1
632	255	1	1	1	1	4	2	2	3	1	0	1	0	0	0	0	0	0	0	0	2	5	4	5	2	4	4	3	3	1	5	4	2	5	4	4	3	5	4	3	4	1	10	3	8	10	10	2	2
455	430	1	1	3	1	2	1	3	3	1	0	0	0	0	0	0	0	0	0	0	3	4	4	3	4	5	3	4	2	2	4	4	4	3	5	4	3	4	4	3	4	1	10	3	8	7	7	3	2
572	175	1	1	1	1	1	1	4	2	1	1	1	1	1	1	1	0	0	0	0	4	3	3	2	5	1	1	1	5	1	5	1	1	6	1	1	6	1	1	6	1	1	10	1	10	1	3	2	1
77	500	1	1	1	2	1	1	5	2	1	1	0	1	0	0	0	0	1	1	0	4	3	4	1	6	6	4	3	3	2	4	5	5	2	6	6	1	5	1	6	3	10	1	10	1	8	7	2	2
59	325	1	1	2	1	5	1	3	4	1	0	0	0	0	0	0	1	0	0	0	3	4	4	2	5	6	5	2	4	1	5	6	4	3	5	2	5	6	2	5	5	10	1	10	1	10	10	1	1
533	377	1	1	1	1	2	1	3	4	0	0	0	0	0	0	1	0	0	0	0	3	4	3	3	4	5	4	4	2	2	4	5	3	4	4	4	3	5	3	4	5	10	1	10	1	9	9	2	2
381	1074	1	1	1	1	2	1	3	4	1	0	1	0	0	0	0	0	0	0	0	3	4	4	3	4	4	4	3	3	3	3	4	2	5	6	4	3	5	2	5	6	10	1	7	4	10	10	2	2
439	163	1	1	1	1	4	2	3	2	0	0	1	0	0	0	0	0	0	0	0	4	3	4	3	4	5	4	4	2	4	2	4	4	3	5	3	4	5	5	2	4	9	2	10	1	8	7	2	2
307	84	1	2	3	1	2	2	3	2	1	1	1	0	0	0	0	0	0	0	0	4	3	5	5	2	4	3	3	3	3	3	4	4	3	4	4	3	4	4	3	4	9	2	9	2	9	9	2	2
33	488	1	1	2	1	1	4	2	2	1	0	0	0	0	0	0	0	0	0	1	5	2	4	2	5	5	2	4	2	2	4	4	4	3	6	5	2	4	4	3	4	8	3	8	3	8	8	3	3
22	621	1	1	1	1	2	2	3	2	0	0	1	1	0	0	0	1	1	0	0	2	5	5	2	5	6	5	3	3	1	5	5	4	3	6	4	3	5	5	2	5	7	4	10	1	9	10	2	2
516	1343	1	1	1	1	2	2	3	2	1	0	0	0	0	0	0	0	1	0	0	4	3	3	4	3	5	4	3	3	3	3	4	5	2	5	4	3	6	4	3	5	7	4	8	3	7	9	2	2
417	650	1	2	1	1	4	2	3	2	1	0	0	0	0	0	1	0	1	0	0	4	3	3	3	4	4	4	4	2	2	4	4	6	1	4	4	3	5	3	4	4	7	4	8	3	6	6	2	2
449	651	1	1	2	1	2	2	2	4	1	0	1	0	1	0	0	0	0	0	0	2	5	5	1	6	6	5	3	3	1	5	6	2	5	6	2	5	6	1	6	4	7	4	7	4	7	7	1	1
422	529	1	1	2	1	2	2	3	2	1	1	0	0	0	0	0	0	0	0	0	3	4	3	3	4	5	4	2	4	2	4	5	1	6	6	3	4	4	3	4	5	7	4	6	5	8	9	2	2
357	311	1	1	1	1	3	1	3	4	1	1	0	0	0	0	0	0	0	0	0	3	4	3	3	4	5	4	2	4	1	5	5	3	4	6	3	4	5	3	4	4	6	5	9	2	9	7	1	1
607	319	1	1	1	1	3	2	2	4	1	0	1	0	0	0	0	0	0	0	0	3	4	4	3	4	5	4	3	3	2	4	5	2	5	5	4	3	4	2	5	4	6	5	9	2	8	9	2	2
627	111	2	1	1	1	2	1	3	4	1	0	0	0	0	0	1	0	0	0	0	2	5	5	2	5	3	3	3	3	3	3	4	4	3	4	4	3	4	4	3	4	6	5	8	3	6	3	1	1
428	164	1	1	1	2	3	4	2	2	0	0	1	0	0	0	0	0	0	0	0	2	5	3	3	4	3	3	3	3	3	3	5	4	3	4	4	3	4	4	3	4	6	5	7	4	5	9	2	2
177	485	1	2	1	2	5	2	3	2	1	0	1	0	0	0	0	0	0	0	0	4	3	4	5	2	5	3	4	2	2	4	4	4	3	5	3	4	5	5	2	5	6	5	6	5	6	6	2	2
222	253	1	1	2	1	2	2	3	2	1	0	1	0	0	0	0	0	0	0	0	4	3	3	3	4	4	3	4	2	2	4	2	2	5	5	5	2	5	5	2	5	5	6	3	8	4	4	2	3
54	202	1	1	2	2	3	1	3	4	1	0	0	0	0	0	0	0	1	0	0	2	5	4	3	4	4	4	4	2	1	5	4	2	5	5	3	4	5	2	5	4	4	7	9	2	9	9	2	2
123	361	1	1	3	2	2	2	3	2	1	0	1	0	0	0	0	0	1	1	0	3	4	3	2	5	5	4	2	4	1	5	4	2	5	4	2	5	4	1	6	5	4	7	9	2	8	9	2	2
651	363	1	1	1	1	3	2	2	4	1	0	1	0	0	0	0	0	0	0	0	4	3	3	3	4	4	3	4	2	3	3	4	3	4	4	5	2	4	1	6	2	4	7	9	2	7	6	1	1
375	444	1	1	1	1	2	1	3	4	1	0	0	0	0	0	0	0	0	0	0	3	4	5	3	4	6	4	3	3	1	5	5	4	3	6	5	2	5	3	4	6	4	7	5	6	7	7	2	2
76	395	1	1	1	2	4	2	3	2	1	0	0	0	0	0	0	0	1	0	0	3	4	5	1	6	6	4	3	3	1	5	5	2	5	6	4	3	5	1	6	5	4	7	4	7	8	7	2	2
396	615	1	1	1	1	3	2	3	2	1	0	1	0	0	0	0	0	0	0	1	2	5	4	2	5	5	4	2	4	1	5	5	3	4	6	3	4	6	2	5	5	3	8	9	2	9	10	2	2
377	372	1	1	1	1	1	2	2	4	1	0	0	0	0	0	0	0	1	0	0	3	4	4	3	4	5	4	4	2	1	5	6	2	5	6	2	5	5	3	4	5	1	10	10	1	9	10	2	2
111	412	1	1	2	2	5	2	3	2	1	0	0	0	1	0	0	0	1	0	0	3	4	5	2	5	6	5	5	1	1	5	6	2	5	6	2	5	6	1	6	6	1	10	10	1	8	10	2	1
470	442	1	1	3	2	1	2	2	4	1	0	1	1	1	1	0	0	0	0	0	1	6	4	4	3	4	3	3	3	2	4	4	3	4	5	4	3	5	4	3	4	1	10	10	1	6	6	2	1
281	404	1	1	2	1	6	2	3	2	1	0	1	0	0	0	0	1	1	1	0	2	5	5	1	6	6	5	1	5	1	5	5	2	5	6	2	5	6	2	5	5	1	10	10	1	9	10	1	1
420	390	1	1	2	1	4	4	2	2	1	0	1	0	0	0	0	1	1	1	0	4	3	3	3	4	5	3	4	2	3	3	4	3	4	6	4	3	5	2	5	5	1	10	9	2	9	9	2	2
106	678	1	2	2	1	5	2	3	2	1	0	0	0	1	0	0	0	1	0	0	2	5	5	2	5	5	4	4	2	1	5	4	2	5	6	2	5	5	2	5	5	1	10	9	2	8	8	2	2
73	447	1	1	2	2	4	1	3	4	1	0	0	0	0	0	0	1	1	0	0	4	3	5	1	6	6	5	2	4	1	5	5	4	3	6	3	4	6	2	5	4	1	10	7	4	8	9	2	2
351	481	1	1	2	1	1	1	4	3	1	0	1	0	0	0	0	0	1	1	0	1	6	5	1	6	5	4	2	4	3	3	4	3	4	6	4	3	4	3	4	4	9	2	9	2	9	9	1	1
24	430	1	1	1	1	4	3	2	3	1	0	0	0	0	0	0	0	0	1	0	2	5	5	2	5	6	3	3	3	3	3	6	2	5	6	3	4	5	2	5	3	8	3	8	3	8	8	2	2
199	179	1	1	2	1	1	3	2	3	1	1	1	0	0	0	0	0	0	0	0	3	4	5	4	3	4	3	4	2	2	4	5	3	4	6	4	3	4	4	3	4	8	3	4	7	7	4	1	2
252	56	1	1	1	1	3	3	2	3	0	0	0	1	0	0	0	0	0	0	0	4	3	3	5	2	3	3	3	3	2	4	4	3	4	4	3	4	4	3	4	4	7	4	7	4	8	9	3	3
664	233	1	2	1	1	2	1	4	3	1	0	1	0	0	0	1	1	1	0	0	4	3	4	4	3	4	4	3	3	3	3	4	2	5	4	4	3	5	5	2	5	7	4	7	4	8	8	1	1
117	364	1	1	3	1	1	3	2	3	1	0	0	0	0	0	0	0	0	0	0	2	5	4	3	4	4	4	3	3	3	3	3	1	6	4	3	4	4	3	4	5	7	4	7	4	7	7	2	3
544	484	1	1	1	1	3	3	2	3	0	0	1	0	0	0	0	0	1	0	0	2	5	4	3	4	3	4	3	3	4	2	5	3	4	5	4	3	5	4	3	4	5	6	8	3	6	8	1	2
143	384	1	1	3	2	2	1	4	3	1	0	0	0	0	0	0	0	0	0	0	3	4	4	2	5	4	4	2	4	2	4	5	2	5	5	2	5	4	4	3	4	4	7	4	7	4	4	1	1
619	577	1	1	1	1	2	3	2	3	1	1	1	0	0	0	0	0	1	0	0	3	4	5	2	5	6	4	1	5	2	4	6	4	3	6	2	5	5	2	5	6	1	10	9	2	10	10	2	1
300	299	1	1	2	1	2	1	4	3	1	0	1	0	0	0	0	0	0	0	0	3	4	4	3	4	4	2	3	3	1	5	1	3	4	5	2	5	5	2	5	6	1	10	7	4	9	10	2	1
231	435	1	2	2	1	1	1	4	3	1	0	0	0	1	0	0	0	1	0	0	2	5	5	2	5	5	4	3	3	2	4	5	2	5	5	2	5	5	2	5	5	1	10	7	4	7	7	2	2
134	554	1	2	3	2	5	1	3	5	1	0	0	0	1	1	1	0	1	0	0	4	3	4	5	2	5	3	4	2	2	4	3	4	3	6	5	2	3	4	3	4	10	1	3	8	6	4	2	2
167	478	1	2	1	1	1	1	3	5	0	1	0	0	0	0	0	0	0	0	0	2	5	4	1	6	4	2	3	3	2	4	5	3	4	5	2	5	4	4	3	5	10	1	4	7	8	10	1	1
13	80	1	1	1	2	6	1	3	5	0	0	0	0	1	0	0	0	0	0	0	3	4	4	5	2	4	4	3	3	2	4	4	4	3	4	4	3	4	4	3	4	8	3	9	2	9	10	1	3
276	426	1	2	1	2	2	1	3	5	1	0	0	0	1	0	1	0	1	1	0	3	4	4	3	4	5	4	2	4	3	3	4	4	3	5	3	4	5	3	4	4	7	4	10	1	9	10	2	2
447	4824	1	2	1	1	2	2	2	5	1	0	1	0	0	0	0	0	1	0	1	3	4	5	3	4	6	2	3	3	3	3	5	2	5	6	4	3	4	2	5	5	7	4	10	1	9	10	2	2
152	365	1	2	1	2	2	1	3	5	1	0	1	0	0	0	0	0	1	1	0	3	4	4	3	4	4	4	3	3	1	5	5	4	3	6	4	3	5	2	5	5	7	4	10	1	8	10	2	2
78	445	1	1	2	1	2	1	3	5	1	0	0	0	0	0	0	0	0	0	1	4	3	3	4	3	4	3	4	2	3	3	4	4	3	6	5	2	4	4	3	5	7	4	9	2	7	7	2	2
505	574	1	2	1	2	4	1	3	5	0	0	0	0	0	0	0	0	0	1	0	3	4	5	2	5	6	3	4	2	2	4	5	5	2	6	5	2	6	3	4	4	7	4	7	4	7	7	2	2
179	366	1	2	1	1	1	2	2	5	1	0	0	0	0	0	0	0	1	0	0	3	4	5	3	4	5	5	3	3	3	3	4	3	4	4	3	4	4	3	4	5	6	5	7	4	6	6	3	2
114	613	1	1	2	1	3	1	3	5	1	0	0	0	0	0	0	0	0	0	0	2	5	5	3	4	5	4	3	3	3	3	5	2	5	6	3	4	4	2	5	4	5	6	8	3	8	8	3	2
582	742	1	2	1	2	5	2	2	5	0	0	1	0	0	0	1	1	0	0	0	3	4	4	3	4	5	4	4	2	1	5	4	4	3	5	4	3	4	3	4	5	5	6	7	4	8	7	2	2
136	595	1	2	3	1	4	1	3	5	1	0	0	0	0	1	0	0	0	1	0	3	4	3	1	6	5	3	4	2	3	3	5	4	3	6	5	2	5	1	6	4	4	7	4	7	9	9	2	2
258	291	1	1	1	1	2	2	2	5	1	0	0	0	0	0	0	0	1	0	0	3	4	4	3	4	6	4	3	3	2	4	5	1	6	5	2	5	5	3	4	5	3	8	10	1	8	10	2	2
52	542	1	2	2	2	4	1	3	5	1	0	0	0	1	0	0	0	1	0	0	2	5	4	2	5	5	3	1	5	1	5	5	4	3	6	3	4	5	2	5	5	1	10	9	2	9	10	1	1
636	553	1	1	1	1	3	1	3	5	1	0	0	0	0	0	0	0	0	0	0	4	3	3	2	5	2	3	3	3	3	3	4	4	3	5	3	4	3	3	4	4	1	10	9	2	9	9	1	1
398	458	1	2	1	1	1	1	3	5	1	0	0	0	0	0	0	0	0	0	0	4	3	5	4	3	5	3	3	3	2	4	6	3	4	6	4	3	5	3	4	6	1	10	7	4	10	10	3	2
537	327	1	2	1	1	1	1	3	5	1	0	0	0	0	0	0	0	0	0	0	6	1	4	4	3	6	4	3	3	1	5	5	3	4	6	4	3	4	3	4	5	1	10	7	4	10	10	2	2
310	760	1	1	1	1	2	1	3	5	1	0	0	0	0	0	0	0	1	0	0	3	4	4	3	4	5	4	3	3	2	4	4	4	3	3	3	4	4	3	4	4	1	10	7	4	8	10	2	2
305	533	1	2	2	2	3	1	3	5	1	0	0	0	0	0	0	1	0	0	0	3	4	3	3	4	5	5	2	4	2	4	6	2	5	6	3	4	6	4	3	4	1	10	7	4	7	7	1	1
595	499	1	1	1	1	2	2	2	5	1	0	0	0	0	0	0	0	1	0	0	3	4	4	3	4	4	5	3	3	2	4	4	4	3	4	4	3	4	3	4	4	1	10	7	4	7	7	1	1
219	492	1	2	2	2	2	1	3	5	1	0	0	0	0	0	0	0	1	1	0	4	3	5	5	2	2	3	4	2	4	2	4	6	1	2	5	2	2	5	2	4	1	10	4	7	6	5	1	1
251	250	1	1	1	1	1	2	3	3	1	0	1	0	0	0	1	1	1	1	0	3	4	5	3	4	6	5	1	5	1	5	6	2	5	6	3	4	6	2	5	6	10	1	10	1	10	10	1	1
335	310	1	2	2	2	4	2	3	3	0	0	0	0	1	0	0	1	1	0	0	1	6	5	2	5	5	4	4	2	2	4	5	5	2	6	5	2	6	2	5	5	10	1	10	1	9	9	2	2
35	315	1	1	1	2	2	2	3	3	1	0	1	1	0	0	0	0	0	0	0	4	3	5	3	4	5	4	4	2	2	4	5	5	2	6	5	2	5	5	2	4	10	1	10	1	4	5	2	3
306	456	1	2	2	1	2	3	3	2	0	0	0	0	0	0	0	0	0	0	1	3	4	4	3	4	5	4	3	3	1	5	5	4	3	6	3	4	4	2	5	5	10	1	9	2	7	7	2	2
214	338	1	1	2	2	5	2	3	3	1	0	1	0	0	0	0	0	0	1	0	4	3	3	4	3	5	4	4	2	3	3	5	3	4	4	4	3	4	4	3	4	9	2	8	3	8	9	2	2
203	345	1	1	1	1	4	2	3	3	1	0	1	0	0	0	0	0	0	0	0	4	3	4	3	4	5	4	3	3	3	3	4	4	3	4	4	3	4	4	3	4	9	2	7	4	8	7	2	2
94	468	1	1	2	1	2	2	3	3	0	0	0	0	0	0	0	1	1	1	1	5	2	3	6	1	1	2	5	1	5	1	2	3	4	5	5	2	2	4	3	2	9	2	4	7	5	3	3	3
361	290	1	1	1	1	2	3	3	2	0	0	1	0	0	0	0	0	1	0	0	3	4	3	3	4	5	4	3	3	3	3	4	4	3	4	3	4	4	3	4	4	8	3	8	3	8	8	2	2
571	181	1	1	1	2	3	2	4	2	0	0	1	0	0	0	0	0	1	0	0	2	5	4	3	4	5	4	3	3	2	4	5	2	5	4	4	3	4	4	3	4	8	3	8	3	8	8	2	2
635	110	1	1	1	1	2	2	3	3	0	0	1	0	0	0	0	0	0	1	0	3	4	3	3	4	3	3	3	3	3	3	4	4	3	3	3	4	3	4	3	3	8	3	7	4	8	7	1	1
546	302	1	1	1	2	2	2	3	3	0	1	1	0	1	0	0	0	0	0	0	4	3	4	3	4	5	4	4	2	2	4	5	3	4	6	4	3	5	2	5	5	7	4	10	1	9	8	1	1
270	282	1	1	2	1	1	2	3	3	1	1	1	0	0	0	0	0	1	1	0	4	3	3	2	5	5	4	3	3	2	4	4	5	2	5	4	3	4	4	3	5	7	4	9	2	9	8	3	1
16	1219	1	1	2	1	3	2	3	3	1	0	1	0	0	0	0	0	0	1	0	2	5	3	2	5	6	4	3	3	1	5	5	3	4	6	3	4	5	2	5	5	7	4	7	4	8	10	2	1
302	395	1	2	2	1	2	3	3	2	1	0	0	0	0	0	0	0	0	0	0	2	5	4	5	2	5	4	4	2	4	2	5	5	2	5	5	2	5	5	2	5	7	4	7	4	8	9	2	2
141	179	1	1	3	2	2	2	3	3	0	0	1	0	0	0	0	0	0	0	0	3	4	3	3	4	6	5	4	2	2	4	6	4	3	6	5	2	4	4	3	4	7	4	7	4	7	7	2	2
161	225	1	1	2	1	4	1	5	3	0	0	0	1	0	0	0	1	0	0	0	2	5	4	2	5	4	3	3	3	3	3	3	4	3	5	4	3	4	4	3	4	7	4	7	4	7	7	2	2
350	215	1	1	1	1	4	3	2	4	0	1	0	0	0	0	0	0	0	0	0	4	3	3	5	2	4	3	3	3	3	3	4	4	3	4	4	3	4	3	4	4	7	4	7	4	7	7	2	2
510	225	1	2	1	2	2	2	3	3	1	0	1	0	0	0	0	0	0	0	0	3	4	4	3	4	4	3	3	3	3	3	4	4	3	4	4	3	4	4	3	4	7	4	7	4	7	7	2	2
588	613	1	2	1	1	5	3	3	2	1	0	1	0	0	0	0	0	0	0	0	4	3	4	4	3	4	3	3	3	4	2	4	5	2	4	4	3	4	5	2	3	7	4	7	4	7	7	3	2
5	252	1	2	2	1	2	1	4	4	1	0	0	0	0	0	0	0	0	1	0	3	4	4	3	4	4	3	3	3	3	3	5	4	3	6	4	3	4	3	4	5	6	5	10	1	8	10	2	2
31	290	1	1	2	1	6	1	5	3	1	1	0	0	0	0	0	0	0	0	0	3	4	4	3	4	4	3	3	3	3	3	4	4	3	4	4	3	4	4	3	4	6	5	8	3	8	8	2	2
462	854	1	1	1	2	5	2	3	3	0	0	1	0	0	0	0	0	0	0	0	5	2	3	5	2	5	3	4	2	2	4	4	4	3	4	4	3	4	3	4	4	5	6	10	1	7	7	2	2
112	1638	1	1	2	1	6	1	5	3	1	0	0	0	0	0	0	0	0	0	0	1	6	5	2	5	6	4	2	4	2	4	6	1	6	6	2	5	6	2	5	5	5	6	10	1	7	2	2	1
341	141	1	1	1	1	2	2	3	3	0	0	1	0	0	0	0	0	0	0	1	4	3	3	4	3	4	4	4	2	4	2	5	4	3	4	3	4	3	3	4	3	5	6	5	6	5	6	2	1
408	287	1	1	1	1	2	3	2	4	1	0	1	0	0	0	0	0	0	1	1	2	5	4	5	2	5	3	3	3	2	4	4	5	2	4	4	3	4	2	5	4	4	7	10	1	9	10	2	2
459	143	1	1	1	1	1	3	2	4	0	0	1	0	0	0	0	0	0	0	0	3	4	4	2	5	5	5	2	4	2	4	5	6	1	6	6	1	6	6	1	6	4	7	10	1	8	10	2	2
154	751	1	1	3	1	3	1	4	4	1	0	1	0	0	0	0	0	0	0	0	3	4	4	2	5	6	4	3	3	1	5	5	4	3	6	3	4	5	3	4	4	4	7	7	4	8	10	2	2
185	557	1	2	1	1	2	2	3	3	1	0	0	0	0	0	0	0	1	0	0	3	4	4	3	4	5	4	2	4	2	4	5	3	4	6	4	3	5	2	5	4	4	7	7	4	7	10	2	2
592	187	1	1	1	1	2	3	3	2	0	0	1	0	0	0	0	0	0	0	0	2	5	3	3	4	5	3	2	4	2	4	5	5	2	6	5	2	5	5	2	5	3	8	10	1	9	10	2	2
649	266	1	1	1	1	2	2	3	3	1	0	0	0	0	0	1	0	1	0	0	3	4	4	4	3	5	4	3	3	2	4	5	4	3	5	4	3	4	6	1	5	3	8	8	3	9	8	2	2
395	717	1	1	1	1	2	2	3	3	0	1	1	0	0	0	0	0	1	1	0	3	4	4	2	5	6	5	3	3	1	5	5	3	4	6	2	5	5	1	6	5	3	8	7	4	9	8	1	1
43	360	1	2	2	1	2	3	3	2	1	0	0	0	1	1	0	0	1	0	0	1	6	4	4	3	5	4	2	4	2	4	5	2	5	6	2	5	5	2	5	5	1	10	10	1	10	10	1	1
321	541	2	2	2	1	2	3	3	2	1	1	1	0	0	0	0	0	1	0	0	2	5	5	2	5	6	4	2	4	1	5	5	2	5	6	2	5	6	2	5	6	1	10	10	1	10	10	1	1
155	245	1	1	1	2	1	3	3	2	1	0	1	0	0	0	0	0	1	0	0	3	4	4	2	5	5	4	2	4	2	4	5	2	5	6	4	3	5	3	4	5	1	10	10	1	9	10	2	2
620	288	1	1	1	1	2	2	3	3	1	0	1	0	0	0	0	0	0	0	0	3	4	4	3	4	4	4	3	3	2	4	4	4	3	5	3	4	5	5	2	4	1	10	10	1	9	10	1	1
412	825	1	1	1	1	1	3	2	4	1	1	1	0	0	0	0	1	1	0	0	3	4	5	2	5	6	5	2	4	1	5	4	5	2	6	1	6	5	2	5	5	1	10	10	1	9	10	2	1
630	287	1	1	1	2	2	2	3	3	1	1	0	0	0	0	0	0	1	1	0	3	4	5	2	5	5	4	3	3	2	4	5	3	4	5	3	4	5	2	5	5	1	10	9	2	10	10	2	2
192	851	1	1	1	1	2	2	3	3	1	0	1	1	0	0	0	0	1	0	0	3	4	5	3	4	5	4	3	3	2	4	5	4	3	5	4	3	5	2	5	4	1	10	9	2	9	10	2	2
250	343	1	1	3	1	2	2	3	3	1	0	1	0	0	0	0	0	0	0	0	3	4	4	2	5	5	4	3	3	2	4	4	5	2	5	3	4	5	2	5	5	1	10	9	2	8	10	2	2
591	411	1	1	1	2	3	3	2	4	0	0	0	1	0	0	0	0	1	1	0	3	4	3	4	3	3	2	4	2	3	3	4	4	3	6	5	2	4	4	3	4	1	10	9	2	8	7	2	1
173	396	1	1	1	1	3	3	3	2	1	0	0	0	0	0	0	0	0	0	0	1	6	4	3	4	6	5	3	3	3	3	6	4	3	6	4	3	6	1	6	5	1	10	8	3	9	10	1	2
416	1263	1	2	1	2	4	1	4	4	1	0	1	0	0	0	0	0	0	0	0	3	4	3	3	4	4	4	3	3	2	4	5	4	3	4	4	3	4	3	4	4	1	10	8	3	8	8	2	2
245	370	1	2	1	1	3	2	3	3	1	0	1	0	0	0	0	0	0	0	0	2	5	4	2	5	6	5	1	5	1	5	5	2	5	5	2	5	6	2	5	6	1	10	7	4	10	10	2	2
642	1060	1	2	1	1	4	2	3	3	1	0	1	0	1	0	0	0	0	0	0	2	5	4	2	5	5	5	2	4	1	5	6	1	6	6	2	5	6	1	6	6	1	10	7	4	9	10	2	1
616	501	1	1	1	2	6	2	3	3	1	0	0	0	0	0	0	0	0	0	1	3	4	5	2	5	6	4	3	3	2	4	5	2	5	5	4	3	5	1	6	5	1	10	7	4	9	9	1	1
130	430	1	2	3	1	1	1	5	3	1	0	1	0	0	1	1	0	0	1	0	3	4	5	3	4	5	4	3	3	2	4	6	5	2	4	4	3	6	2	5	5	1	10	7	4	8	10	2	1
596	807	1	1	1	2	3	2	3	3	1	0	0	0	1	0	0	0	0	0	0	3	4	4	2	5	5	5	3	3	2	4	5	2	5	6	2	5	5	2	5	4	1	10	7	4	8	10	2	2
387	553	1	1	1	2	6	3	3	2	1	0	0	0	0	0	0	0	1	0	1	3	4	5	3	4	6	5	3	3	1	5	6	4	3	6	4	3	6	3	4	6	1	10	7	4	7	9	2	2
513	368	1	2	1	1	3	2	3	3	0	0	1	0	1	0	0	1	1	0	0	4	3	4	3	4	5	4	3	3	2	4	5	4	3	6	3	4	5	3	4	5	1	10	7	4	7	9	2	2
48	374	1	1	3	2	1	2	3	3	1	0	1	0	0	0	0	0	1	0	0	3	4	4	2	5	4	4	3	3	2	4	5	3	4	4	4	3	5	2	5	5	1	10	7	4	7	7	2	2
548	527	1	2	1	1	2	2	3	3	1	0	0	0	0	0	0	0	0	0	0	4	3	3	3	4	4	3	4	2	3	3	4	4	3	5	4	3	4	2	5	4	1	10	7	4	7	7	2	2
266	278	1	1	2	1	3	4	2	3	1	0	1	0	0	0	0	0	1	0	1	2	5	3	4	3	4	4	1	5	1	5	5	5	2	6	3	4	3	3	4	3	1	10	6	5	8	10	1	1
578	499	1	1	1	1	2	2	3	3	1	0	0	0	0	0	0	0	1	1	0	4	3	4	3	4	5	5	2	4	2	4	4	4	3	5	5	2	5	3	4	3	1	10	6	5	7	8	2	2
391	349	1	1	1	1	3	2	3	3	1	0	1	0	0	0	0	0	1	0	0	1	6	5	1	6	3	3	4	2	3	3	4	2	5	5	2	5	4	2	5	5	1	10	5	6	10	10	2	2
309	370	1	1	1	2	1	4	2	3	0	0	1	0	0	0	0	0	1	0	0	3	4	4	2	5	5	4	3	3	2	4	5	4	3	5	4	3	5	2	5	4	1	10	5	6	7	9	2	2
587	440	1	1	1	1	3	2	4	2	1	0	1	0	0	0	0	0	1	0	0	1	6	4	3	4	4	4	3	3	2	4	5	3	4	6	2	5	5	2	5	5	1	10	4	7	9	10	2	2
109	875	1	2	2	1	4	2	3	3	1	0	1	0	1	1	0	0	0	0	0	4	3	4	3	4	5	3	3	3	2	4	4	5	2	5	4	3	3	4	3	5	1	10	4	7	8	5	2	2
298	465	1	2	2	1	3	1	4	4	1	0	1	0	0	0	0	0	1	1	0	4	3	3	3	4	5	4	3	3	2	4	5	5	2	4	3	4	6	2	5	2	1	10	4	7	5	9	2	2
206	305	1	2	1	1	2	2	3	3	0	1	0	0	1	0	0	0	1	0	0	3	4	4	5	2	5	3	2	4	2	4	5	4	3	5	4	3	4	6	1	6	1	10	1	10	10	10	2	2
458	406	1	1	1	1	1	2	3	3	1	0	1	0	0	0	0	0	1	1	0	2	5	5	1	6	5	4	4	2	1	5	6	4	3	6	5	2	6	3	4	4	1	10	1	10	7	5	2	2
292	405	1	1	1	1	4	1	4	5	1	0	1	0	0	0	0	0	1	1	0	3	4	4	3	4	5	5	3	3	3	3	5	3	4	6	4	3	6	2	5	5	9	2	9	2	9	9	2	2
347	325	1	1	1	1	2	1	4	5	1	0	1	0	0	0	1	0	0	0	0	3	4	3	2	5	4	4	3	3	2	4	4	2	5	5	3	4	5	2	5	5	8	3	8	3	8	9	2	1
383	593	1	1	1	1	2	1	4	5	1	0	0	0	0	0	0	0	1	0	0	4	3	3	3	4	3	2	3	3	3	3	5	5	2	6	6	1	3	3	4	4	7	4	10	1	8	7	3	3
352	422	2	1	1	1	4	1	4	5	0	0	0	0	0	0	0	0	0	1	1	4	3	2	4	3	3	2	3	3	3	3	3	5	2	4	4	3	1	4	3	3	6	5	5	6	3	4	3	2
628	212	1	1	1	2	6	3	2	5	0	0	1	0	0	0	0	1	0	1	0	1	6	5	1	6	6	5	1	5	1	5	6	1	6	6	1	6	6	1	6	6	1	10	7	4	10	10	1	1
331	277	1	1	2	2	5	5	2	3	1	1	0	0	0	0	0	0	1	1	0	3	4	5	1	6	6	4	3	3	1	5	5	3	4	6	3	4	6	1	6	5	1	10	7	4	9	9	2	2
545	248	1	1	1	1	5	2	3	4	1	1	1	0	0	0	0	0	0	0	0	1	6	5	2	5	6	5	1	5	1	5	6	1	6	6	2	5	6	6	1	4	10	1	10	1	10	10	2	2
194	528	1	1	1	2	2	2	3	4	0	0	1	1	0	0	0	0	0	0	0	4	3	3	3	4	4	3	4	2	2	4	1	6	1	6	6	1	4	5	2	5	10	1	10	1	8	10	3	3
531	74	1	1	1	1	4	2	3	4	0	0	0	1	0	0	0	0	0	0	0	5	2	3	4	3	4	4	3	3	4	2	4	5	2	4	4	3	5	4	3	5	10	1	7	4	7	6	2	2
525	585	1	1	1	1	1	2	3	4	1	0	1	0	0	0	0	0	1	0	0	3	4	4	2	5	5	4	3	3	3	3	5	4	3	6	3	4	5	2	5	4	9	2	8	3	5	10	2	2
660	420	1	1	3	2	3	2	5	2	0	0	1	0	0	0	0	1	1	0	0	4	3	5	2	5	4	2	5	1	2	4	1	4	3	1	4	3	2	4	3	3	9	2	4	7	4	4	3	2
440	77	1	1	1	1	5	4	2	4	0	0	0	0	0	1	0	0	0	0	0	4	3	3	4	3	4	2	4	2	3	3	4	4	3	4	4	3	3	4	3	4	7	4	9	2	7	10	2	2
658	1154	1	1	1	1	2	4	3	2	0	0	1	0	0	0	0	0	1	0	0	3	4	4	3	4	4	3	3	3	3	3	5	4	3	6	5	2	4	2	5	5	7	4	8	3	8	8	3	2
104	451	1	2	2	2	2	2	5	2	1	0	0	0	0	0	0	0	1	0	0	1	6	5	2	5	6	4	1	5	1	5	6	4	3	5	4	3	4	1	6	4	7	4	7	4	7	7	2	2
390	457	1	1	1	2	3	4	3	2	1	0	1	0	0	0	0	0	0	0	0	5	2	5	3	4	5	5	3	3	1	5	5	6	1	6	6	1	6	2	5	6	7	4	7	4	5	7	2	2
90	343	2	1	1	1	2	2	3	4	1	0	1	0	0	0	0	0	1	0	0	4	3	3	4	3	4	3	2	4	2	4	4	4	3	5	4	3	5	6	1	5	7	4	6	5	6	6	2	2
539	255	1	1	1	2	2	4	3	2	1	0	1	0	0	0	0	0	0	0	0	4	3	3	4	3	4	3	4	2	3	3	4	4	3	4	4	3	4	4	3	4	7	4	3	8	3	4	2	2
629	216	1	1	1	1	1	2	3	4	0	1	0	0	1	0	0	0	0	0	0	3	4	4	2	5	4	4	4	2	2	4	5	5	2	6	3	4	5	2	5	5	4	7	9	2	8	8	2	2
411	875	1	2	1	1	2	2	3	4	1	1	0	0	0	0	0	0	0	1	0	3	4	3	4	3	4	3	3	3	1	5	5	4	3	5	2	5	4	4	3	4	3	8	7	4	8	9	2	2
36	353	1	1	1	1	1	4	3	2	0	0	1	0	0	0	0	0	0	0	0	3	4	4	2	5	6	5	2	4	1	5	5	1	6	6	3	4	6	1	6	6	2	9	5	6	10	10	1	2
385	531	1	1	1	1	1	4	3	2	0	0	1	0	0	0	0	0	1	0	0	3	4	5	2	5	4	5	3	3	2	4	5	3	4	6	5	2	6	2	5	4	1	10	10	1	9	10	2	2
372	379	1	1	1	1	3	1	5	4	1	0	0	0	0	0	0	0	1	1	0	3	4	4	5	2	5	5	3	3	2	4	5	2	5	6	4	3	6	2	5	4	1	10	10	1	8	10	1	2
601	215	1	1	1	1	4	4	3	2	0	0	1	0	0	0	0	0	0	0	0	1	6	3	3	4	5	4	1	5	1	5	5	4	3	5	3	4	5	1	6	5	1	10	9	2	8	10	2	2
463	261	1	1	3	1	6	2	5	2	0	0	1	0	0	0	0	0	0	0	0	1	6	5	1	6	6	5	1	5	1	5	5	3	4	5	5	2	6	4	3	4	1	10	8	3	8	6	1	1
86	536	1	1	2	1	2	4	3	2	0	0	1	0	0	0	0	1	1	1	0	3	4	4	2	5	5	5	1	5	1	5	6	6	1	6	3	4	6	1	6	6	1	10	7	4	8	10	1	1
655	446	1	1	1	2	1	2	3	4	1	0	0	0	0	0	0	0	0	0	0	4	3	5	3	4	5	3	4	2	1	5	4	5	2	4	6	1	4	2	5	5	1	10	7	4	8	6	1	1
574	418	1	2	1	1	2	3	3	3	0	0	1	0	0	0	0	0	1	0	0	2	5	5	2	5	4	3	3	3	2	4	5	2	5	6	3	4	5	2	5	5	10	1	9	2	8	10	2	1
311	131	1	2	2	1	1	3	3	3	1	0	0	0	0	0	0	0	0	0	0	4	3	2	3	4	4	2	3	3	3	3	3	3	4	4	4	3	4	4	3	4	9	2	9	2	9	8	2	2
512	819	1	2	1	1	2	2	4	3	1	0	1	0	0	0	0	0	0	0	0	4	3	4	5	2	5	4	3	3	1	5	5	4	3	6	4	3	4	4	3	3	9	2	6	5	7	8	2	1
336	90	1	1	2	1	1	3	3	3	0	0	1	0	0	0	0	0	0	0	0	3	4	3	3	4	4	3	3	3	3	3	4	4	3	4	4	3	4	4	3	4	8	3	7	4	7	7	2	2
98	516	1	1	2	2	4	2	4	3	1	0	1	0	0	0	0	1	1	0	0	1	6	4	3	4	6	4	3	3	2	4	6	1	6	6	2	5	6	6	1	6	8	3	4	7	10	10	1	2
148	189	1	1	1	1	1	3	3	3	1	1	1	0	0	0	0	0	0	0	0	2	5	4	3	4	6	4	3	3	3	3	4	4	3	6	6	1	5	5	2	5	7	4	9	2	9	10	2	1
407	769	1	2	1	1	3	3	3	3	0	0	1	0	0	0	0	0	0	1	0	3	4	3	3	4	4	4	3	3	2	4	4	4	3	4	4	3	4	4	3	4	7	4	8	3	8	6	2	2
225	162	1	1	2	2	3	3	3	3	0	0	1	0	0	0	0	0	0	0	0	3	4	3	3	4	4	4	3	3	2	4	4	4	3	4	4	3	4	4	3	4	7	4	7	4	7	7	2	2
217	174	1	1	1	1	1	3	4	2	0	0	1	0	0	0	0	0	0	0	1	3	4	4	2	5	5	4	3	3	2	4	6	6	1	6	6	1	6	6	1	6	6	5	10	1	9	10	1	1
244	381	1	1	1	1	1	2	4	3	0	0	1	0	0	0	0	0	0	0	0	2	5	5	3	4	6	5	3	3	3	3	5	2	5	6	3	4	6	2	5	5	6	5	6	5	6	10	2	2
644	565	1	1	1	2	4	3	4	2	1	0	1	0	0	0	0	0	1	0	0	4	3	3	4	3	4	4	4	2	3	3	4	4	3	5	5	2	3	4	3	5	6	5	4	7	5	6	2	2
183	293	1	2	1	2	1	3	3	3	1	0	0	0	0	0	0	0	1	1	0	3	4	3	4	3	5	3	3	3	1	5	4	4	3	5	4	3	4	5	2	5	5	6	9	2	9	9	1	1
21	444	1	1	1	1	3	3	3	3	1	0	1	0	1	0	0	1	1	0	0	3	4	4	3	4	5	4	3	3	1	5	5	2	5	6	4	3	5	2	5	6	4	7	9	2	8	10	2	2
471	313	1	2	3	1	2	3	4	2	1	0	1	0	1	1	0	1	1	1	0	2	5	4	4	3	6	3	4	2	2	4	4	4	3	4	3	4	4	4	3	4	4	7	7	4	8	10	2	2
271	2609	1	2	1	2	2	2	4	3	1	0	0	0	0	0	0	0	0	0	0	3	4	4	2	5	6	5	3	3	1	5	6	2	5	6	2	5	6	1	6	6	4	7	6	5	8	8	1	1
637	1051	1	1	1	2	3	2	4	3	1	0	1	0	0	0	0	1	0	0	0	3	4	4	3	4	5	3	3	3	2	4	5	2	5	6	4	3	6	1	6	6	3	8	10	1	10	10	2	2
61	292	1	1	2	1	5	3	3	3	1	0	0	0	0	0	0	0	0	0	0	2	5	5	5	2	5	4	4	2	4	2	4	2	5	5	5	2	5	5	2	5	2	9	7	4	7	10	2	2
156	731	1	1	1	1	2	3	3	3	1	0	1	0	0	0	0	0	1	0	0	3	4	3	3	4	5	5	3	3	2	4	5	4	3	5	4	3	5	3	4	4	2	9	7	4	7	9	2	2
523	439	1	1	1	1	1	3	3	3	0	1	1	0	0	0	0	1	1	0	0	1	6	5	1	6	6	5	1	5	1	5	6	6	1	6	6	1	6	6	1	6	1	10	10	1	10	10	1	1
442	351	1	1	1	2	2	3	3	3	1	0	1	0	0	0	0	0	0	1	0	3	4	3	2	5	5	3	2	4	2	4	4	3	4	6	2	5	5	2	5	5	1	10	10	1	10	10	1	1
11	418	1	1	1	1	3	3	3	3	0	0	1	0	0	0	0	0	1	1	0	2	5	5	1	6	6	5	1	5	1	5	6	3	4	6	2	5	5	2	5	5	1	10	10	1	10	10	2	2
543	318	1	1	1	1	3	3	3	3	1	1	0	0	1	0	0	0	1	0	0	2	5	4	2	5	6	4	1	5	1	5	5	3	4	4	3	4	6	2	5	4	1	10	10	1	5	10	1	1
486	329	1	1	1	2	6	3	3	3	0	1	0	0	0	0	0	0	1	1	0	3	4	3	2	5	5	3	3	3	3	3	4	4	3	6	3	4	5	2	5	5	1	10	9	2	8	10	2	2
248	283	1	2	1	1	4	2	4	3	0	0	1	0	0	1	1	0	1	1	0	3	4	5	1	6	6	5	1	5	1	5	6	1	6	6	1	6	6	1	6	6	1	10	8	3	10	10	1	1
269	800	1	2	1	1	1	2	4	3	1	0	1	0	0	0	1	0	1	1	1	2	5	4	2	5	5	4	3	3	1	5	6	2	5	6	2	5	6	2	5	6	1	10	8	3	9	10	1	1
497	370	1	2	1	2	6	3	3	3	0	0	1	1	0	0	0	0	0	1	0	2	5	4	3	4	6	3	2	4	2	4	5	3	4	6	4	3	5	3	4	5	1	10	7	4	9	7	2	2
2	203	1	1	2	1	3	3	3	3	1	1	1	0	0	0	0	0	1	0	0	2	5	3	3	4	4	3	3	3	3	3	4	3	4	4	3	4	4	3	4	4	1	10	7	4	7	9	1	1
500	279	1	2	1	1	2	3	3	3	1	0	1	0	0	0	0	0	1	0	0	4	3	4	5	2	4	4	4	2	2	4	4	4	3	6	4	3	3	4	3	3	1	10	7	4	7	7	2	2
597	410	1	1	1	1	2	3	3	3	0	0	1	0	0	0	0	0	0	0	0	3	4	4	3	4	5	4	4	2	2	4	5	5	2	5	5	2	5	4	3	5	1	10	7	4	7	7	2	2
647	253	1	1	1	1	1	3	4	2	1	1	1	0	1	0	0	0	1	0	0	2	5	4	2	5	6	5	1	5	1	5	6	6	1	6	2	5	6	2	5	6	1	10	6	5	9	10	2	2
490	290	1	1	1	1	1	3	3	3	0	0	1	0	0	0	0	0	0	0	0	3	4	5	1	6	6	3	1	5	1	5	6	1	6	6	3	4	6	1	6	5	1	10	3	8	9	10	1	1
566	940	1	1	1	1	4	3	3	3	1	0	1	0	0	0	0	0	0	0	0	3	4	5	1	6	6	5	3	3	1	5	6	1	6	6	3	4	6	1	6	5	1	10	1	10	10	7	2	2
128	633	1	1	1	1	6	1	5	5	1	0	1	0	0	0	0	0	0	1	0	3	4	4	2	5	6	4	2	4	2	4	6	2	5	6	2	5	6	2	5	5	10	1	10	1	9	10	1	1
189	277	1	1	1	2	3	4	2	5	0	0	1	0	0	0	0	1	0	1	0	2	5	5	3	4	5	3	3	3	2	4	4	2	5	2	2	5	5	2	5	4	10	1	9	2	9	10	2	2
229	363	1	1	1	1	1	1	5	5	1	0	0	0	0	0	0	0	0	0	0	3	4	4	5	2	5	4	3	3	4	2	4	5	2	4	4	3	4	4	3	4	4	7	7	4	7	7	2	2
517	337	1	1	1	1	1	2	3	5	1	1	1	1	0	0	0	0	0	0	0	1	6	5	1	6	6	5	2	4	1	5	6	1	6	6	2	5	6	2	5	3	1	10	10	1	10	10	2	1
639	368	1	1	1	1	1	1	5	5	1	0	0	0	0	0	0	0	1	1	1	3	4	4	4	3	5	3	1	5	2	4	4	3	4	4	6	1	6	5	2	4	1	10	10	1	9	10	1	1
367	466	1	1	1	1	2	1	5	5	1	0	0	0	0	0	0	0	0	1	1	3	4	3	3	4	4	4	3	3	2	4	4	3	4	5	4	3	5	2	5	4	1	10	10	1	8	10	1	1
659	519	1	2	2	1	2	1	5	5	1	0	0	0	0	1	0	0	1	1	0	3	4	3	3	4	6	2	4	2	2	4	4	4	3	5	2	5	5	2	5	4	1	10	10	1	8	10	2	1
621	292	1	1	1	1	1	2	3	5	1	1	0	0	0	0	0	0	1	0	0	3	4	4	2	5	6	5	1	5	1	5	5	3	4	5	3	4	6	1	6	4	1	10	7	4	9	9	1	1
166	384	1	1	1	2	3	2	3	5	1	0	1	0	0	0	0	1	0	0	0	1	6	5	1	6	6	5	1	5	1	5	6	2	5	6	2	5	6	1	6	5	1	10	6	5	7	7	2	2
208	357	1	1	1	1	4	4	3	3	1	1	1	0	0	0	0	0	1	1	0	1	6	5	1	6	6	5	1	5	1	5	6	1	6	6	1	6	6	1	6	6	10	1	10	1	10	10	1	1
218	259	1	1	1	1	1	4	3	3	0	0	1	0	0	0	0	0	0	0	0	3	4	3	2	5	6	3	3	3	1	5	5	4	3	6	4	3	5	1	6	3	10	1	10	1	7	10	1	1
567	312	1	1	1	2	1	4	3	3	1	1	1	0	1	0	0	1	1	1	0	3	4	3	3	4	5	4	1	5	3	3	5	5	2	5	2	5	5	2	5	5	10	1	10	1	10	10	2	2
284	283	1	1	1	1	5	4	4	2	0	0	1	1	0	0	0	0	1	0	0	4	3	3	4	3	4	3	3	3	2	4	4	4	3	4	4	3	5	3	4	5	10	1	10	1	8	9	3	2
85	138	1	1	2	2	2	3	5	2	0	0	1	0	0	0	0	0	0	0	0	3	4	3	3	4	5	3	3	3	3	3	4	4	3	4	4	3	4	4	3	4	10	1	9	2	8	9	2	3
519	293	1	1	1	1	1	4	4	2	0	0	1	0	0	0	0	0	0	0	0	3	4	3	3	4	4	3	4	2	3	3	4	4	3	4	4	3	4	4	3	4	9	2	8	3	8	8	2	2
376	367	1	1	1	1	3	4	3	3	0	0	1	0	0	0	0	0	0	0	0	3	4	4	2	5	5	5	3	3	2	4	4	4	3	6	3	4	6	1	6	6	8	3	10	1	8	10	2	2
254	573	1	2	1	1	1	4	4	2	0	0	1	0	0	0	0	0	1	1	0	3	4	4	3	4	5	5	3	3	1	5	5	4	3	6	3	4	5	2	5	5	8	3	9	2	8	9	2	2
399	351	1	1	1	1	3	4	3	3	0	0	1	0	0	0	0	0	1	0	0	3	4	3	3	4	5	3	3	3	2	4	5	4	3	6	4	3	5	4	3	3	8	3	8	3	7	7	2	2
668	549	2	1	1	1	2	3	3	4	0	0	1	1	0	0	0	0	1	1	0	3	4	4	4	3	4	3	4	2	1	5	5	5	2	6	4	3	6	3	4	5	7	4	9	2	7	7	2	2
631	376	1	1	1	2	3	4	4	2	0	0	1	0	0	0	0	1	1	0	0	3	4	4	5	2	5	4	2	4	1	5	5	4	3	6	2	5	5	2	5	5	7	4	7	4	8	10	2	2
436	337	1	1	1	2	6	4	4	2	0	0	1	0	0	0	0	0	0	0	0	3	4	4	2	5	4	4	4	2	3	3	4	4	3	6	4	3	4	3	4	4	7	4	7	4	8	5	2	2
160	447	1	1	1	1	2	4	3	3	0	0	1	0	0	0	0	0	0	0	0	3	4	3	3	4	5	3	4	2	2	4	4	4	3	6	4	3	4	2	5	4	7	4	7	4	7	7	2	2
207	203	1	1	1	2	6	3	3	4	0	0	1	0	0	0	0	0	0	0	0	3	4	4	3	4	6	5	3	3	1	5	6	6	1	6	6	1	6	6	1	6	7	4	7	4	7	7	2	2
626	2098	1	2	1	1	2	2	4	4	0	1	1	0	0	0	0	0	1	0	0	3	4	3	3	4	5	4	3	3	3	3	4	5	2	5	4	3	4	3	4	4	7	4	7	4	7	7	2	2
502	416	1	1	1	2	2	4	3	3	0	0	1	0	0	0	0	0	0	0	0	3	4	3	4	3	5	4	4	2	2	4	4	4	3	6	4	3	4	4	3	4	6	5	10	1	9	7	2	2
210	193	1	1	1	1	2	2	4	4	1	0	0	0	0	0	0	0	0	0	0	2	5	3	3	4	3	3	3	3	3	3	4	4	3	3	3	4	3	3	4	3	6	5	7	4	7	5	1	2
617	514	1	1	1	1	2	2	4	4	1	0	1	0	0	0	0	0	1	0	0	3	4	4	3	4	5	4	3	3	1	5	5	5	2	6	4	3	5	2	5	4	5	6	7	4	8	8	2	2
113	239	1	1	3	1	2	3	5	2	0	0	1	0	0	0	0	0	0	0	0	3	4	4	3	4	6	3	4	2	1	5	4	2	5	5	5	2	4	3	4	6	5	6	5	6	7	7	2	2
262	295	1	1	1	1	3	2	5	3	0	0	1	0	0	0	0	1	1	1	0	4	3	4	3	4	4	3	3	3	3	3	5	3	4	5	3	4	5	3	4	5	5	6	5	6	5	5	2	2
576	396	1	2	1	1	2	3	5	2	1	1	1	0	0	0	0	0	1	0	0	2	5	4	3	4	4	3	1	5	2	4	4	2	5	3	3	4	5	5	2	4	4	7	10	1	10	10	2	2
191	376	1	1	3	1	4	3	3	4	1	1	1	0	0	0	0	0	0	0	0	3	4	4	2	5	5	4	3	3	2	4	5	2	5	6	5	2	6	1	6	5	4	7	7	4	9	9	2	2
589	398	1	1	2	1	2	4	3	3	0	0	1	0	0	0	0	0	0	0	0	2	5	4	3	4	5	4	2	4	2	4	5	4	3	5	5	2	5	2	5	4	4	7	7	4	8	7	1	1
26	394	1	1	1	1	1	4	3	3	1	1	1	0	0	0	0	1	1	1	0	2	5	4	2	5	6	5	1	5	1	5	6	1	6	6	2	5	6	1	6	6	4	7	5	6	8	7	2	1
294	283	1	1	1	1	3	4	3	3	0	0	1	0	0	0	0	0	0	0	0	4	3	5	3	4	6	4	4	2	2	4	6	2	5	5	4	3	6	3	4	6	3	8	10	1	9	7	2	1
579	503	1	2	1	2	5	3	3	4	1	0	1	0	0	0	0	0	1	0	0	2	5	5	2	5	4	4	3	3	2	4	4	4	3	5	3	4	5	2	5	5	3	8	9	2	9	10	1	1
228	338	1	1	1	1	1	2	4	4	1	0	1	0	0	0	0	1	0	0	0	3	4	5	3	4	6	5	3	3	2	4	6	2	5	6	3	4	6	2	5	5	3	8	8	3	9	10	1	1
556	353	1	1	1	1	1	3	3	4	1	0	0	0	0	0	0	0	0	0	0	2	5	5	2	5	5	5	2	4	2	4	6	2	5	5	3	4	5	2	5	5	3	8	6	5	9	10	2	2
590	816	1	1	1	1	3	3	3	4	1	0	1	0	0	0	0	0	1	0	0	3	4	4	3	4	5	3	3	3	2	4	5	4	3	5	4	3	5	3	4	4	3	8	5	6	7	7	2	2
604	281	1	1	1	2	3	4	3	3	1	1	1	0	0	0	0	0	1	0	0	2	5	5	2	5	4	2	1	5	1	5	4	3	4	2	2	5	4	3	4	3	2	9	9	2	8	9	2	2
62	349	1	1	2	1	3	3	3	4	1	0	0	0	0	0	0	0	0	0	0	3	4	4	1	6	6	4	3	3	1	5	6	1	6	5	3	4	5	5	2	5	1	10	10	1	10	10	1	1
508	378	1	1	1	1	3	4	3	3	0	0	1	0	0	0	0	0	1	0	0	3	4	4	2	5	5	4	4	2	2	4	5	4	3	4	5	2	4	4	3	4	1	10	10	1	10	10	2	4
75	740	1	1	2	2	1	3	5	2	0	0	1	0	0	0	0	0	0	0	0	3	4	5	2	5	5	5	3	3	1	5	5	2	5	6	5	2	5	2	5	5	1	10	10	1	9	10	1	2
364	339	1	1	1	2	2	4	3	3	0	0	1	0	0	0	0	1	1	0	0	1	6	5	2	5	5	4	2	4	2	4	6	2	5	6	2	5	5	2	5	5	1	10	10	1	9	10	2	2
313	266	1	2	2	2	1	3	3	4	1	0	0	0	1	1	1	0	0	0	0	1	6	5	2	5	5	4	2	4	1	5	6	1	6	6	2	5	5	1	6	5	1	10	10	1	7	7	1	1
286	557	1	1	1	1	5	2	4	4	1	1	1	1	0	0	0	0	1	0	0	3	4	5	2	5	5	4	1	5	1	5	6	2	5	6	2	5	6	1	6	5	1	10	10	1	10	10	1	1
427	399	1	1	1	1	2	4	3	3	0	0	1	0	0	0	0	0	0	1	0	2	5	5	1	6	6	5	1	5	1	5	6	2	5	6	3	4	6	1	6	4	1	10	7	4	10	10	1	1
371	364	1	1	1	2	1	3	3	4	1	1	1	0	0	0	0	0	1	0	0	3	4	5	1	6	6	4	3	3	1	5	6	2	5	6	3	4	6	2	5	6	1	10	7	4	9	10	1	1
239	430	1	2	1	1	3	3	3	4	0	1	1	0	0	0	0	0	0	0	0	3	4	4	2	5	5	4	3	3	1	5	5	2	5	6	2	5	5	1	6	5	1	10	7	4	9	9	2	1
265	369	1	1	1	2	2	4	3	3	0	0	1	1	0	0	0	0	0	0	0	3	4	3	4	3	4	4	4	2	2	4	5	3	4	6	3	4	5	2	5	5	1	10	7	4	9	9	2	1
293	334	1	1	1	1	3	4	3	3	1	0	1	0	0	0	0	0	1	0	1	1	6	5	2	5	6	5	2	4	1	5	6	2	5	6	2	5	6	2	5	5	1	10	6	5	10	10	1	1
247	448	1	2	1	2	2	2	5	3	1	1	0	0	1	0	0	0	1	1	0	3	4	4	3	4	5	3	3	3	2	4	4	4	3	5	3	4	5	3	4	5	1	10	6	5	9	10	2	2
358	286	1	1	1	1	3	5	2	5	1	1	1	0	0	0	0	0	0	0	0	1	6	5	1	6	6	5	1	5	1	5	6	1	6	6	1	6	6	1	6	6	1	10	10	1	10	10	1	1
209	1362	1	1	1	1	4	3	4	3	1	0	0	0	0	0	0	0	0	0	0	4	3	5	3	4	5	4	3	3	2	4	5	2	5	4	4	3	4	3	4	4	5	6	7	4	9	8	2	2
289	654	1	1	1	1	2	3	4	3	0	0	1	0	0	0	0	0	1	0	0	3	4	4	3	4	4	4	4	2	1	5	5	4	3	4	4	3	5	2	5	5	4	7	10	1	9	10	2	2
643	256	1	1	1	2	1	3	4	3	0	0	1	1	0	0	0	1	1	1	0	3	4	5	1	6	6	5	1	5	5	1	6	3	4	6	2	5	6	1	6	6	4	7	7	4	10	10	1	1
137	318	1	1	1	1	2	3	4	3	1	1	1	0	0	0	0	1	1	0	0	2	5	5	3	4	6	5	1	5	1	5	6	3	4	6	2	5	6	2	5	6	1	10	10	1	10	10	2	1
333	2689	1	1	1	1	1	3	4	3	1	1	0	0	0	0	0	0	1	1	1	3	4	3	3	4	5	4	3	3	1	5	6	4	3	6	4	3	5	2	5	5	1	10	10	1	9	10	1	1
608	305	1	1	1	1	5	3	4	3	0	0	1	0	0	0	0	0	1	1	0	3	4	3	3	4	5	4	3	3	3	3	5	4	3	4	2	5	4	2	5	4	1	10	9	2	10	10	1	1
476	442	1	1	1	1	2	3	4	3	0	0	1	0	0	0	0	0	0	0	0	2	5	5	2	5	5	4	2	4	2	4	5	2	5	6	2	5	5	2	5	2	1	10	5	6	8	10	2	2
568	962	1	1	1	1	2	3	3	5	0	1	1	0	0	0	0	0	1	1	0	3	4	4	5	2	5	4	4	2	2	4	4	5	2	5	6	1	5	4	3	5	10	1	7	4	7	6	3	2
424	278	1	1	1	1	2	2	4	5	1	0	1	0	0	0	0	0	0	0	0	4	3	5	3	4	6	2	3	3	1	5	6	6	1	6	6	1	6	6	1	6	10	1	1	10	1	1	2	2
563	446	1	1	1	2	3	3	3	5	0	0	0	1	0	0	0	0	1	0	0	2	5	5	1	6	6	5	2	4	1	5	4	4	3	6	5	2	5	1	6	5	10	1	10	1	7	10	3	2
272	399	1	2	1	2	2	5	3	3	0	0	1	0	0	1	0	1	0	1	0	3	4	3	3	4	3	4	3	3	2	4	4	4	3	4	4	3	4	4	3	4	7	4	8	3	7	6	2	2
7	539	1	2	1	1	3	2	4	5	0	0	0	0	0	0	0	0	0	0	1	3	4	4	3	4	5	4	2	4	1	5	5	4	3	6	4	3	5	3	4	5	5	6	10	1	8	10	2	2
238	328	1	2	1	1	2	3	3	5	1	0	0	0	1	1	0	0	1	0	0	3	4	4	2	5	5	4	3	3	2	4	5	2	5	4	3	4	5	2	5	5	3	8	7	4	7	10	2	2
526	506	1	1	1	1	5	3	3	5	1	1	1	0	0	0	0	0	1	0	0	4	3	3	3	4	5	4	3	3	2	4	5	2	5	6	3	4	4	2	5	5	2	9	9	2	9	9	2	2
410	366	1	1	1	1	3	3	3	5	0	1	0	0	0	0	0	0	0	0	0	1	6	3	1	6	5	4	3	3	2	4	5	3	4	6	2	5	5	2	5	5	1	10	7	4	10	9	1	1
17	401	1	1	1	1	3	3	3	5	0	0	0	1	0	0	0	0	0	0	0	2	5	4	3	4	5	4	3	3	2	4	5	1	6	5	2	5	5	1	6	5	1	10	7	4	8	10	2	1
346	264	1	1	1	2	3	3	3	5	0	1	1	0	0	0	0	0	1	0	0	3	4	3	3	4	4	4	4	2	2	4	5	5	2	5	5	2	5	5	2	5	1	10	4	7	9	10	2	2
10	400	1	1	2	1	1	4	5	2	1	0	1	1	0	0	0	1	1	1	0	4	3	3	4	3	4	3	4	2	3	3	4	3	4	5	4	3	3	4	3	3	9	2	9	2	9	9	2	1
91	245	1	1	2	2	6	4	5	2	0	0	1	0	0	0	0	0	1	0	0	3	4	4	2	5	5	4	2	4	2	4	5	3	4	6	2	5	6	2	5	5	7	4	10	1	8	10	2	2
131	216	1	1	1	1	2	4	5	2	0	0	1	0	0	1	1	1	1	1	0	4	3	4	2	5	6	5	3	3	3	3	4	4	3	4	4	3	4	4	3	4	7	4	7	4	7	7	2	2
478	210	1	1	1	2	4	4	5	2	0	0	1	0	0	0	0	0	0	0	0	3	4	5	3	4	5	5	1	5	3	3	5	3	4	6	5	2	5	2	5	2	6	5	7	4	7	7	2	2
80	407	1	1	2	1	1	4	5	2	0	0	1	0	0	0	0	0	0	0	0	5	2	3	3	4	4	3	4	2	4	2	3	5	2	6	5	2	4	3	4	3	6	5	7	4	7	6	3	2
57	301	1	1	2	1	1	4	5	2	1	0	1	0	0	0	0	0	1	1	0	3	4	4	2	5	5	4	2	4	2	4	5	2	5	6	2	5	6	1	6	5	4	7	10	1	8	10	1	1
444	4392	1	1	1	1	4	4	3	4	1	0	1	0	0	0	0	0	0	0	0	2	5	5	2	5	5	5	3	3	2	4	5	1	6	6	2	5	6	2	5	5	4	7	10	1	9	10	2	2
453	215	1	1	3	1	2	2	5	4	1	0	1	0	0	0	0	0	1	0	0	2	5	5	1	6	6	5	3	3	1	5	6	6	1	6	3	4	6	3	4	6	4	7	9	2	8	10	2	2
121	327	1	1	3	1	2	4	3	4	0	0	1	0	0	0	0	0	1	1	1	2	5	4	5	2	5	4	4	2	2	4	4	4	3	5	3	4	5	3	4	4	3	8	10	1	8	10	2	2
278	559	1	1	1	1	1	4	5	2	1	0	1	0	0	0	0	0	1	0	0	2	5	5	2	5	6	5	2	4	1	5	6	3	4	6	1	6	6	1	6	6	1	10	10	1	10	10	1	1
540	367	1	1	1	2	2	4	5	2	0	0	1	0	0	0	0	0	0	0	0	3	4	3	3	4	6	3	3	3	3	3	4	3	4	5	3	4	5	3	4	5	1	10	10	1	10	10	2	2
541	1115	1	1	1	2	5	2	5	4	1	0	1	1	0	0	0	0	1	1	0	2	5	4	2	5	6	5	1	5	1	5	6	6	1	6	6	1	6	2	5	6	1	10	10	1	10	10	1	1
641	1204	1	1	1	2	2	4	3	4	1	0	1	0	0	0	0	1	1	0	0	3	4	5	2	5	6	4	3	3	2	4	5	2	5	6	2	5	4	2	5	3	1	10	9	2	9	10	2	1
640	745	1	1	1	1	2	2	5	4	0	0	1	0	0	0	0	0	1	0	0	4	3	4	2	5	5	4	4	2	2	4	4	5	2	5	5	2	4	4	3	5	1	10	5	6	6	4	2	2
213	486	1	1	1	2	3	4	4	3	1	0	1	0	0	0	0	0	0	0	0	1	6	5	2	5	6	5	2	4	1	5	6	6	1	6	6	1	6	6	1	6	10	1	10	1	10	10	1	1
503	403	1	2	1	2	6	4	4	3	0	0	1	0	0	0	0	0	0	0	0	3	4	3	1	6	2	2	4	2	4	2	4	4	3	4	4	3	3	3	4	3	10	1	2	9	7	6	3	1
443	968	1	1	1	2	6	4	4	3	0	0	1	0	0	0	0	0	0	1	0	4	3	3	3	4	5	4	4	2	1	5	4	4	3	6	5	2	4	3	4	5	10	1	10	1	7	5	2	2
613	390	1	1	1	1	3	4	4	3	0	1	1	0	1	0	0	0	0	0	0	4	3	3	4	3	6	4	4	2	1	5	5	4	3	6	4	3	6	3	4	6	10	1	7	4	8	7	1	1
340	464	1	1	2	1	4	3	4	4	1	1	1	0	0	0	0	0	1	0	0	3	4	4	3	4	5	3	4	2	2	4	5	5	2	6	4	3	5	3	4	6	10	1	7	4	7	7	2	2
518	1590	1	1	1	2	6	3	5	3	1	0	0	1	0	0	0	1	0	0	0	3	4	4	3	4	5	4	2	4	2	4	5	2	5	5	5	2	5	4	3	4	9	2	10	1	10	10	1	2
515	344	1	1	1	2	5	4	4	3	1	0	1	0	0	0	0	0	1	0	0	2	5	4	2	5	5	4	3	3	4	2	4	2	5	6	3	4	4	3	4	4	9	2	7	4	7	7	2	2
356	301	1	2	1	2	3	3	5	3	0	0	1	0	0	0	0	1	0	1	0	3	4	3	3	4	4	3	3	3	2	4	4	5	2	4	4	3	4	3	4	4	8	3	7	4	6	7	2	2
317	860	1	1	1	2	1	4	4	3	1	0	1	0	0	0	0	0	1	0	0	2	5	4	2	5	6	3	3	3	2	4	4	3	4	6	3	4	4	3	4	6	8	3	6	5	8	9	1	2
614	370	1	1	1	1	2	4	4	3	1	1	1	0	1	0	0	0	0	0	0	2	5	4	2	5	6	5	3	3	1	5	5	2	5	6	3	4	6	1	6	6	7	4	7	4	9	10	2	1
445	4523	1	1	1	1	3	4	4	3	0	0	1	1	0	0	0	0	1	1	0	4	3	4	3	4	4	4	4	2	2	4	5	4	3	6	5	2	6	3	4	5	7	4	6	5	7	7	3	2
598	322	1	1	1	2	6	3	4	4	0	0	0	1	0	0	0	0	0	0	0	3	4	4	4	3	4	2	4	2	3	3	3	2	5	3	4	3	4	4	3	4	7	4	6	5	6	6	2	2
400	490	2	1	1	1	2	4	4	3	1	0	1	0	0	0	0	0	1	0	0	3	4	4	3	4	5	4	4	2	2	4	5	4	3	5	5	2	5	5	2	4	7	4	5	6	8	7	2	2
68	202	1	1	1	2	3	4	4	3	0	1	1	1	0	0	0	0	1	0	0	2	5	5	4	3	3	3	3	3	4	2	2	4	3	4	4	3	5	3	4	4	6	5	7	4	9	10	1	1
599	480	1	2	2	1	3	3	4	4	0	1	0	0	0	0	0	0	0	0	0	2	5	4	3	4	6	3	4	2	1	5	5	4	3	4	5	2	4	3	4	5	6	5	4	7	7	7	2	1
221	471	1	1	1	2	6	4	4	3	1	1	1	0	0	0	0	0	0	0	0	4	3	3	3	4	4	4	3	3	1	5	5	4	3	5	3	4	5	2	5	5	5	6	8	3	7	8	1	1
211	1689	1	1	1	2	6	4	4	3	1	1	1	0	0	0	0	0	1	0	0	3	4	5	2	5	6	5	1	5	1	5	6	1	6	6	1	6	6	1	6	6	5	6	7	4	7	7	1	1
520	404	1	1	1	1	1	4	4	3	1	1	1	0	0	0	0	0	1	0	0	1	6	5	1	6	6	5	1	5	1	5	6	1	6	6	3	4	6	1	6	5	5	6	6	5	9	10	1	1
147	223	1	1	2	1	1	4	4	3	0	0	1	0	0	0	0	0	0	0	0	3	4	4	3	4	5	5	3	3	3	3	4	4	3	4	4	3	4	4	3	4	5	6	5	6	5	5	2	3
12	315	1	1	2	1	2	4	4	3	1	0	1	0	0	0	0	0	1	0	0	2	5	5	2	5	6	3	3	3	2	4	5	2	5	6	2	5	6	2	5	5	4	7	9	2	8	10	2	2
288	396	1	1	1	1	2	4	4	3	1	0	1	0	0	0	0	0	1	0	0	4	3	3	4	3	5	4	5	1	2	4	5	3	4	6	2	5	5	2	5	5	4	7	7	4	8	10	2	2
606	233	1	1	1	2	4	4	4	3	0	0	1	0	0	0	0	0	1	1	0	3	4	4	3	4	5	4	3	3	2	4	5	3	4	5	4	3	6	2	5	5	4	7	5	6	9	8	2	2
84	146	1	1	2	1	2	3	4	4	0	0	0	1	0	0	0	0	0	0	0	1	6	1	1	6	1	1	1	5	1	5	1	1	6	1	1	6	1	1	6	1	4	7	4	7	4	4	2	2
374	432	1	1	1	1	2	4	4	3	1	0	1	0	0	0	0	0	1	0	0	3	4	4	2	5	6	4	3	3	1	5	5	2	5	5	2	5	5	2	5	6	2	9	10	1	10	10	2	1
521	388	1	1	1	1	1	4	4	3	0	0	1	0	0	0	0	0	1	0	0	2	5	5	2	5	6	5	1	5	1	5	6	1	6	6	2	5	5	2	5	5	2	9	10	1	9	10	1	1
197	374	1	1	1	1	2	3	4	4	0	0	1	0	0	0	0	0	0	0	0	2	5	5	1	6	6	5	1	5	1	5	6	2	5	6	2	5	6	1	6	6	1	10	10	1	10	10	2	2
409	262	1	1	1	2	2	3	5	3	0	0	1	0	0	0	0	0	0	0	0	2	5	5	1	6	6	5	1	5	1	5	6	1	6	6	1	6	6	1	6	6	1	10	10	1	10	10	1	1
14	196	1	1	1	1	1	4	4	3	1	1	1	0	0	0	0	1	0	0	0	3	4	5	1	6	6	5	4	2	1	5	6	2	5	5	2	5	5	1	6	5	1	10	10	1	10	10	1	1
514	374	1	1	1	1	2	4	4	3	1	0	1	0	0	0	0	0	1	1	0	2	5	4	2	5	5	3	3	3	2	4	5	3	4	5	4	3	6	2	5	5	1	10	10	1	8	10	2	1
204	399	1	1	1	1	1	4	4	3	0	0	1	0	0	0	0	0	0	1	0	3	4	4	3	4	5	5	2	4	2	4	4	2	5	6	4	3	5	5	2	5	1	10	10	1	8	9	1	2
384	537	1	1	1	1	1	3	5	3	0	0	1	0	0	0	0	0	0	0	0	1	6	5	3	4	5	4	2	4	2	4	5	2	5	5	2	5	5	1	6	4	1	10	10	1	9	10	1	1
492	449	1	1	1	2	1	3	4	4	1	0	1	0	0	0	0	0	1	0	0	2	5	4	3	4	5	4	2	4	2	4	5	5	2	6	3	4	5	3	4	5	1	10	10	1	9	9	2	1
379	402	1	1	2	2	1	3	5	3	0	0	1	0	0	0	0	0	0	0	0	3	4	5	3	4	5	5	1	5	1	5	6	2	5	6	4	3	5	1	6	5	1	10	9	2	10	10	2	1
369	484	1	1	1	1	1	4	4	3	0	0	1	0	0	0	0	0	0	0	0	1	6	5	1	6	6	4	1	5	1	5	6	2	5	6	2	5	5	2	5	5	1	10	8	3	10	10	1	1
287	346	1	1	1	1	1	4	4	3	1	0	1	0	0	0	0	0	1	0	1	3	4	4	2	5	4	4	3	3	1	5	5	4	3	6	3	4	5	1	6	5	1	10	7	4	10	10	2	1
20	215	1	1	2	1	6	4	4	3	0	1	1	0	0	0	0	0	0	0	0	2	5	4	4	3	4	4	3	3	2	4	4	4	3	4	2	5	6	2	5	5	1	10	7	4	7	8	2	2
494	492	1	1	1	1	2	4	4	3	1	0	1	0	0	0	0	0	1	1	0	3	4	4	3	4	4	4	3	3	3	3	5	3	4	5	4	3	5	2	5	5	1	10	5	6	9	8	2	1
171	326	1	1	1	1	2	5	3	4	1	1	0	0	0	0	0	0	0	0	0	2	5	4	1	6	5	4	1	5	1	5	5	6	1	6	2	5	5	1	6	5	10	1	10	1	10	10	1	2
670	262	1	1	3	1	3	3	4	5	0	0	0	0	0	0	0	0	0	0	1	2	5	5	2	5	6	3	3	3	3	3	6	4	3	6	3	4	5	3	4	4	8	3	7	4	7	7	2	2
406	1130	1	1	1	1	2	3	4	5	1	0	1	0	0	0	0	1	1	0	0	2	5	5	3	4	6	4	3	3	1	5	5	2	5	6	3	4	6	2	5	5	7	4	9	2	8	10	2	2
418	676	1	1	1	1	1	3	4	5	0	1	0	0	0	0	0	0	0	0	0	1	6	5	1	6	6	4	2	4	2	4	6	1	6	6	2	5	6	1	6	6	1	10	10	1	10	10	1	1
535	451	1	1	1	2	2	3	4	5	0	0	1	1	0	0	0	0	0	0	0	3	4	3	4	3	5	3	3	3	2	4	4	4	3	6	5	2	4	4	3	5	1	10	7	4	7	7	2	2
30	422	1	1	2	1	2	4	5	3	0	0	1	1	0	0	0	1	0	0	0	2	5	5	2	5	6	4	3	3	1	5	6	4	3	6	3	4	6	2	5	6	10	1	10	1	10	10	2	2
547	444	1	1	2	1	3	4	5	3	0	0	1	0	0	0	0	0	1	0	0	2	5	4	2	5	5	4	3	3	2	4	5	2	5	6	4	3	4	2	5	4	10	1	10	1	8	5	2	2
450	415	1	1	2	1	2	4	5	3	1	0	1	0	0	0	0	0	0	0	0	2	5	4	3	4	5	3	1	5	1	5	5	3	4	6	2	5	6	2	5	6	10	1	10	1	10	10	2	2
656	304	1	1	1	1	3	4	5	3	0	0	1	0	0	0	0	0	1	0	0	3	4	4	5	2	5	5	4	2	4	2	5	5	2	5	5	2	5	5	2	5	10	1	10	1	8	10	2	2
349	326	1	1	1	2	2	4	5	3	0	0	1	0	0	0	0	0	0	0	0	2	5	5	5	2	5	4	3	3	2	4	5	4	3	6	2	5	5	5	2	5	10	1	9	2	8	10	2	2
363	328	1	1	1	1	5	4	4	4	1	0	1	0	0	0	0	0	0	0	0	2	5	4	3	4	6	5	3	3	1	5	5	5	2	6	6	1	6	2	5	6	10	1	7	4	7	7	2	2
220	368	1	1	1	1	4	4	5	3	0	0	1	0	0	0	0	1	0	0	0	3	4	5	3	4	4	4	3	3	1	5	5	3	4	6	3	4	5	3	4	4	9	2	9	2	9	9	1	1
38	387	1	1	2	1	3	4	5	3	0	0	1	0	0	0	0	1	1	0	0	4	3	2	2	5	3	3	5	1	5	1	2	6	1	6	5	2	2	3	4	4	9	2	5	6	5	3	3	2
153	187	1	1	2	1	6	4	5	3	0	0	1	1	0	0	0	0	0	0	0	1	6	3	2	5	5	4	1	5	1	5	5	2	5	6	2	5	5	2	5	6	8	3	7	4	9	7	1	1
522	237	1	1	1	2	3	3	5	4	0	0	1	0	0	0	0	0	0	0	0	2	5	4	3	4	5	3	3	3	2	4	4	4	3	6	5	2	6	4	3	4	7	4	10	1	10	4	2	2
96	301	1	1	2	1	5	4	5	3	0	0	1	0	0	0	0	0	0	0	1	4	3	3	4	3	4	3	3	3	2	4	5	3	4	6	5	2	4	5	2	4	7	4	10	1	8	10	2	2
491	484	1	1	1	1	6	4	4	4	0	0	1	0	0	1	0	0	0	0	0	3	4	4	3	4	4	3	3	3	2	4	5	4	3	6	4	3	5	2	5	4	7	4	9	2	9	9	2	3
460	470	1	1	3	2	4	4	5	3	0	0	1	0	0	0	0	0	0	0	0	3	4	4	3	4	4	3	4	2	2	4	4	4	3	5	5	2	4	4	3	4	7	4	7	4	9	9	2	2
594	714	1	1	1	1	3	4	5	3	0	0	1	0	0	0	0	0	0	0	0	4	3	3	5	2	4	3	3	3	2	4	5	3	4	5	4	3	5	2	5	3	7	4	7	4	8	7	1	1
51	422	1	1	2	2	1	3	5	4	0	0	0	0	0	0	0	0	1	0	0	2	5	5	4	3	5	3	4	2	2	4	3	3	4	5	5	2	5	5	2	5	7	4	7	4	7	8	2	1
187	587	1	1	1	2	2	4	5	3	1	0	1	0	0	0	0	0	0	0	0	2	5	3	2	5	6	5	3	3	1	5	6	1	6	6	2	5	6	1	6	6	7	4	7	4	7	7	2	2
481	301	1	1	1	1	2	4	5	3	0	0	1	0	0	0	0	0	0	0	0	1	6	5	1	6	5	5	2	4	1	5	6	2	5	6	3	4	6	1	6	6	6	5	9	2	8	10	2	2
56	89	1	1	2	2	3	4	5	3	0	0	1	0	0	0	0	0	0	0	0	4	3	3	3	4	3	3	3	3	3	3	3	3	4	3	3	4	3	3	4	3	6	5	6	5	7	9	2	2
437	163	1	1	1	1	2	4	4	4	1	0	1	0	0	0	0	0	1	0	0	3	4	4	4	3	5	3	3	3	3	3	5	3	4	2	3	4	3	3	4	3	6	5	6	5	6	6	2	2
240	234	1	1	1	1	3	4	5	3	1	0	1	0	0	0	0	0	1	0	0	3	4	4	4	3	6	3	1	5	1	5	5	4	3	6	4	3	5	2	5	6	5	6	10	1	8	10	1	1
624	226	1	1	1	2	2	4	5	3	0	0	1	0	0	0	0	0	0	0	0	3	4	4	1	6	6	4	3	3	1	5	6	3	4	6	4	3	6	1	6	5	3	8	10	1	10	10	1	1
268	165	1	1	2	2	1	4	4	4	0	0	0	0	0	0	0	1	0	0	0	2	5	4	3	4	4	3	2	4	2	4	3	2	5	3	2	5	2	2	5	5	3	8	10	1	8	9	2	2
388	640	1	1	1	1	1	4	4	4	1	0	1	0	0	0	0	0	1	1	0	2	5	4	3	4	4	3	3	3	3	3	4	2	5	5	3	4	4	4	3	4	3	8	9	2	8	10	2	2
483	448	1	1	1	1	2	4	5	3	1	0	1	0	0	0	0	0	0	0	0	3	4	4	2	5	5	5	2	4	1	5	5	2	5	5	3	4	5	2	5	5	3	8	7	4	9	9	2	2
405	252	1	1	2	1	2	4	5	3	1	0	1	0	0	0	0	0	1	0	0	3	4	4	2	5	5	3	3	3	2	4	5	5	2	5	3	4	5	2	5	5	3	8	7	4	7	7	2	2
23	434	1	1	1	2	3	4	4	4	0	0	1	1	0	0	0	0	1	1	0	3	4	4	2	5	5	4	3	3	3	3	5	5	2	5	4	3	5	5	2	5	3	8	7	4	6	8	2	2
39	358	1	1	2	1	2	4	5	3	0	0	1	0	0	0	0	0	0	0	0	3	4	5	2	5	4	5	3	3	3	3	5	5	2	6	1	6	6	1	6	6	1	10	10	1	10	10	2	2
95	1091	1	1	2	1	4	4	5	3	0	0	1	1	0	0	0	0	0	0	0	3	4	5	1	6	6	4	3	3	1	5	5	5	2	6	3	4	6	6	1	6	1	10	10	1	10	10	1	1
132	358	1	1	1	2	1	3	5	4	0	0	1	1	0	0	0	0	0	0	0	2	5	5	2	5	5	5	1	5	1	5	5	4	3	6	2	5	6	2	5	4	1	10	10	1	10	10	2	2
498	350	1	1	1	1	1	4	5	3	1	0	1	0	0	0	0	1	0	0	0	1	6	5	1	6	6	5	1	5	1	5	6	1	6	6	2	5	6	1	6	6	1	10	10	1	10	10	1	1
469	207	2	1	2	1	2	3	5	4	0	0	1	0	0	0	0	0	0	0	0	1	6	5	1	6	6	5	1	5	1	5	6	1	6	6	2	5	5	5	2	5	1	10	10	1	10	10	2	1
362	457	1	1	1	2	2	4	5	3	0	0	1	0	0	0	0	0	1	0	0	1	6	5	2	5	6	5	3	3	1	5	6	2	5	6	4	3	6	2	5	6	1	10	10	1	10	10	2	2
430	556	1	1	1	1	6	4	5	3	0	0	1	0	0	0	0	0	0	1	1	1	6	5	3	4	5	5	1	5	2	4	5	6	1	6	2	5	5	2	5	5	1	10	10	1	10	10	1	1
326	203	2	1	2	1	6	4	4	4	0	1	1	1	0	0	0	0	0	0	0	1	6	5	1	6	6	5	1	5	1	5	6	1	6	6	1	6	6	1	6	5	1	10	10	1	10	10	1	1
569	244	1	1	1	1	3	4	5	3	1	1	1	0	0	0	0	1	1	0	0	2	5	5	3	4	6	5	1	5	1	5	6	2	5	6	3	4	6	2	5	6	1	10	10	1	10	10	2	2
380	301	1	1	2	2	4	4	5	3	0	0	1	0	0	0	0	1	1	1	0	3	4	5	3	4	5	3	4	2	2	4	4	4	3	5	3	4	5	3	4	4	1	10	10	1	9	10	1	1
466	448	1	1	1	1	6	4	5	3	1	0	1	0	0	0	0	0	0	1	0	3	4	4	2	5	6	3	3	3	2	4	4	5	2	6	5	2	5	1	6	6	1	10	10	1	8	10	2	2
402	366	1	2	2	1	2	4	5	3	1	0	1	0	0	0	0	0	1	0	0	3	4	4	2	5	6	4	3	3	1	5	5	2	5	6	3	4	5	2	5	5	1	10	10	1	8	10	2	1
108	418	1	1	2	1	1	3	5	4	1	1	1	0	1	0	0	1	1	0	0	2	5	4	1	6	6	5	1	5	2	4	5	5	2	6	6	1	6	6	1	6	1	10	9	2	9	9	2	2
609	332	1	1	1	1	3	4	5	3	1	0	1	0	0	0	0	0	1	0	0	4	3	3	5	2	4	3	3	3	2	4	3	5	2	6	5	2	4	4	3	6	1	10	8	3	9	9	2	2
562	697	1	1	1	1	6	4	5	3	0	0	1	0	0	0	0	0	0	0	0	3	4	4	3	4	6	5	2	4	1	5	6	2	5	6	2	5	6	2	5	5	1	10	8	3	8	10	2	1
355	341	1	1	1	1	5	4	4	4	0	0	1	0	0	0	0	0	0	0	0	2	5	5	2	5	6	5	1	5	1	5	6	1	6	6	1	6	6	1	6	6	1	10	7	4	10	10	1	1
261	439	1	1	1	1	1	4	4	4	0	1	1	0	0	0	0	0	0	0	0	3	4	4	3	4	4	4	3	3	2	4	5	2	5	5	2	5	6	2	5	5	1	10	7	4	10	10	1	1
41	464	1	1	2	1	3	4	5	3	1	0	1	0	1	0	0	0	1	0	0	1	6	3	2	5	5	4	1	5	1	5	5	3	4	6	2	5	6	1	6	6	1	10	7	4	10	9	1	1
489	2736	1	1	1	1	2	3	5	4	1	0	1	0	0	0	0	0	1	1	0	4	3	3	2	5	4	3	4	2	2	4	4	3	4	4	4	3	4	3	4	5	1	10	7	4	9	8	1	1
603	270	1	1	1	1	3	4	5	3	0	0	1	0	0	0	0	0	1	0	0	3	4	3	3	4	5	4	3	3	2	4	5	3	4	5	2	5	5	2	5	5	1	10	7	4	8	10	2	2
345	307	1	1	1	1	4	4	4	4	0	0	1	0	0	0	0	1	0	0	0	1	6	3	2	5	6	5	1	5	1	5	5	4	3	5	2	5	5	2	5	6	1	10	7	4	7	10	2	2
102	327	1	1	1	1	1	4	4	4	1	1	0	0	1	0	0	0	0	0	1	1	6	4	3	4	6	5	1	5	1	5	6	1	6	6	3	4	5	5	2	5	1	10	7	4	7	10	2	2
145	382	1	1	3	1	2	4	5	3	1	1	1	0	0	0	0	0	1	1	0	2	5	4	4	3	4	3	2	4	3	3	4	4	3	6	3	4	4	4	3	4	1	10	7	4	7	8	2	2
162	343	1	1	1	1	3	4	5	3	0	0	1	0	0	0	0	0	1	0	0	1	6	5	6	1	6	5	3	3	5	1	6	6	1	6	3	4	6	3	4	6	1	10	6	5	10	8	2	1
534	434	1	1	1	2	5	4	5	3	0	0	1	1	0	0	0	0	1	0	0	3	4	4	3	4	5	4	3	3	2	4	4	5	2	5	5	2	5	3	4	5	1	10	3	8	10	10	2	1
118	352	1	1	3	1	2	4	5	3	1	0	1	0	0	0	0	0	0	0	0	3	4	4	5	2	4	3	2	4	2	4	5	4	3	6	2	5	5	5	2	4	1	10	3	8	7	10	1	1
115	268	1	1	3	2	6	5	4	4	1	1	1	1	0	0	0	1	1	1	0	1	6	3	3	4	3	3	3	3	3	3	3	3	4	3	3	4	3	3	4	3	10	1	10	1	8	10	1	1
652	394	1	1	1	1	1	3	5	5	1	0	1	0	0	0	0	0	1	1	0	1	6	4	3	4	3	3	3	3	4	2	4	5	2	5	5	2	5	4	3	5	7	4	6	5	7	7	2	2
18	489	1	2	2	1	2	4	4	5	0	0	1	0	0	0	0	0	0	0	0	5	2	3	5	2	4	4	3	3	2	4	4	4	3	3	4	3	4	5	2	4	5	6	1	10	1	4	2	2
44	180	1	1	2	2	6	3	5	5	0	0	0	1	0	0	0	0	0	0	0	3	4	3	3	4	4	3	3	3	3	3	5	5	2	5	4	3	5	2	5	5	4	7	7	4	8	9	2	2
110	322	1	1	2	2	6	3	5	5	0	0	1	0	0	0	0	0	0	0	0	1	6	5	1	6	6	5	1	5	1	5	6	1	6	6	1	6	6	1	6	6	1	10	10	1	10	10	1	1
315	419	1	1	1	1	1	3	5	5	1	0	1	0	0	0	0	0	1	1	0	3	4	3	3	4	3	3	3	3	1	5	3	4	3	6	4	3	4	5	2	4	1	10	9	2	8	7	3	3
4	184	1	1	1	2	2	3	5	5	1	1	1	1	1	1	1	1	1	1	1	6	1	5	1	6	6	5	1	5	1	5	6	1	6	6	1	6	4	4	3	4	1	10	8	3	7	7	1	1
1	175	1	1	2	2	2	4	5	4	0	0	1	0	0	0	0	0	0	0	0	1	6	4	1	6	6	5	2	4	1	5	6	6	1	6	6	1	6	6	1	6	10	1	10	1	10	10	1	1
577	376	1	1	1	1	2	4	5	4	0	0	1	0	0	0	0	0	0	0	0	2	5	5	2	5	6	5	1	5	1	5	6	6	1	6	2	5	6	2	5	5	10	1	10	1	10	10	2	2
182	285	1	1	1	1	1	4	5	4	0	0	1	0	0	0	0	0	0	0	0	4	3	3	3	4	3	3	4	2	2	4	3	4	3	3	5	2	4	4	3	4	10	1	8	3	8	8	3	3
319	383	1	1	2	1	1	4	5	4	0	1	1	0	0	0	0	0	0	1	0	4	3	3	3	4	6	5	4	2	1	5	6	3	4	6	6	1	6	1	6	4	7	4	8	3	9	9	1	1
291	274	1	1	1	1	3	4	5	4	0	0	1	0	0	0	0	0	0	0	0	4	3	3	3	4	4	4	4	2	3	3	4	4	3	4	4	3	4	4	3	4	7	4	7	4	9	8	3	2
495	374	1	1	1	1	4	4	5	4	1	0	1	0	0	0	0	0	1	1	0	3	4	3	3	4	4	4	3	3	2	4	4	2	5	6	3	4	4	1	6	4	7	4	7	4	7	9	1	2
524	310	1	1	1	2	1	4	5	4	1	0	1	1	0	0	0	1	0	0	0	1	6	5	1	6	6	5	1	5	1	5	6	1	6	6	1	6	6	1	6	5	7	4	7	4	7	7	2	1
6	324	1	1	2	1	1	4	5	4	0	0	1	0	0	0	0	1	1	0	0	4	3	3	3	4	5	4	3	3	2	4	5	5	2	5	4	3	4	3	4	3	5	6	8	3	7	8	2	2
551	669	1	1	1	1	1	4	5	4	0	0	1	0	0	0	0	0	0	0	0	3	4	3	3	4	4	4	3	3	3	3	5	4	3	5	5	2	6	3	4	6	5	6	7	4	7	7	2	2
404	342	1	1	1	1	4	4	5	4	1	0	1	0	0	0	0	0	1	0	0	1	6	4	2	5	6	5	3	3	1	5	6	2	5	6	2	5	6	2	5	6	4	7	10	1	9	10	2	2
555	245	1	1	1	2	3	4	5	4	0	0	1	0	0	0	0	0	0	0	0	1	6	4	2	5	4	4	1	5	4	2	4	4	3	4	3	4	5	5	2	5	4	7	7	4	8	7	2	2
320	644	1	1	2	1	3	4	5	4	0	0	1	0	0	0	0	0	0	0	0	2	5	4	2	5	5	3	2	4	2	4	5	2	5	6	2	5	6	2	5	5	3	8	10	1	9	10	1	1
178	245	1	1	1	1	3	4	5	4	0	0	1	0	0	0	0	0	0	0	0	2	5	3	3	4	3	3	3	3	3	3	4	3	4	6	3	4	4	4	3	4	2	9	7	4	8	6	2	2
66	371	1	1	2	1	3	4	5	4	0	0	1	1	0	0	0	0	0	0	0	2	5	4	3	4	4	4	2	4	1	5	5	3	4	6	2	5	5	2	5	5	1	10	10	1	10	10	2	2
263	479	1	1	2	1	2	4	5	4	0	0	1	0	0	0	0	0	0	0	0	1	6	5	1	6	4	5	2	4	1	5	6	1	6	6	2	5	5	1	6	6	1	10	10	1	10	10	1	1
653	272	1	1	1	2	3	4	5	4	0	0	1	0	0	0	0	0	0	0	0	1	6	5	1	6	6	5	1	5	1	5	6	3	4	6	2	5	6	1	6	6	1	10	10	1	10	10	1	1
671	382	1	1	3	1	3	4	5	4	0	0	1	0	0	0	0	0	0	0	0	4	3	3	3	4	4	3	3	3	3	3	4	5	2	5	4	3	4	3	4	3	1	10	10	1	1	7	2	2
64	223	1	1	1	2	6	4	5	4	0	0	1	1	0	0	0	0	0	0	0	4	3	4	3	4	5	4	4	2	2	4	5	3	4	5	5	2	5	2	5	5	1	10	10	1	9	9	2	2
150	307	1	1	1	1	5	4	5	4	1	1	1	0	0	0	0	0	0	0	0	1	6	5	1	6	6	5	1	5	1	5	6	6	1	6	6	1	6	6	1	6	1	10	9	2	10	10	1	1
634	402	1	1	1	1	3	4	5	4	0	0	1	0	0	0	0	1	0	0	0	3	4	4	3	4	4	3	3	3	2	4	5	4	3	5	4	3	5	3	4	5	1	10	8	3	9	9	2	2
452	496	1	1	1	1	2	4	5	4	0	1	1	0	0	0	0	1	1	1	0	2	5	5	1	6	6	5	2	4	1	5	6	2	5	6	2	5	6	2	5	5	1	10	7	4	9	10	3	2
425	2283	1	1	1	2	2	4	5	4	1	0	1	0	0	0	0	0	0	0	0	4	3	4	3	4	5	4	3	3	3	3	5	1	6	6	3	4	5	2	5	4	1	10	7	4	8	10	2	2
650	215	1	1	1	2	6	4	5	4	0	0	1	0	0	0	0	1	0	1	0	2	5	5	2	5	6	4	1	5	1	5	5	5	2	5	2	5	6	2	5	5	1	10	5	6	10	10	2	2
100	869	1	1	2	1	2	4	5	4	0	0	1	0	0	0	0	0	1	0	0	4	3	4	5	2	5	4	4	2	2	4	4	4	3	6	4	3	5	1	6	4	1	10	4	7	7	4	2	1
243	384	1	1	1	1	2	4	5	4	0	0	1	0	0	0	0	0	0	0	0	3	4	4	3	4	4	3	3	3	4	2	3	4	3	4	3	4	3	4	3	3	1	10	1	10	5	9	2	2
403	372	1	1	2	2	6	5	5	4	0	0	0	0	0	0	0	0	0	0	1	1	6	4	1	6	5	5	3	3	2	4	6	5	2	6	5	2	6	2	5	5	10	1	7	4	7	7	2	2
370	323	1	1	1	2	3	5	5	4	1	1	1	1	0	0	0	0	0	0	0	2	5	3	3	4	4	4	3	3	1	5	5	5	2	6	4	3	5	4	3	5	10	1	10	1	9	9	2	2
159	504	1	1	1	1	2	4	5	5	1	0	1	0	0	0	0	0	0	0	0	1	6	5	2	5	6	4	3	3	1	5	6	2	5	6	2	5	6	1	6	6	7	4	10	1	10	10	2	1
170	272	1	1	1	1	1	4	5	5	0	0	1	0	0	0	0	0	0	0	0	1	6	4	3	4	4	3	3	3	3	3	4	4	3	5	4	3	5	5	2	5	7	4	7	4	7	7	2	2
648	640	2	1	1	1	2	4	5	5	0	0	1	0	0	0	0	0	1	0	0	2	5	4	3	4	4	3	3	3	2	4	5	4	3	6	4	3	5	4	3	4	6	5	6	5	7	7	2	3
474	213	1	1	2	1	3	4	5	5	0	0	1	0	0	0	0	0	0	0	0	4	3	5	2	5	5	3	4	2	3	3	5	3	4	4	3	4	4	4	3	4	5	6	3	8	5	4	1	1
586	284	1	1	1	1	2	4	5	5	0	0	1	0	0	0	0	0	0	0	0	3	4	4	3	4	5	4	3	3	3	3	5	5	2	5	3	4	5	3	4	4	4	7	9	2	8	9	2	2
273	415	1	2	1	1	4	4	5	5	1	1	1	1	1	1	0	0	1	1	0	1	6	4	2	5	5	4	2	4	2	4	5	3	4	6	2	5	5	2	5	5	2	9	10	1	8	4	2	2
334	189	1	1	1	2	1	5	5	4	1	0	1	1	0	0	0	1	0	1	0	2	5	4	1	6	5	4	4	2	2	4	5	5	2	5	5	2	5	5	2	5	2	9	7	4	8	9	1	1
366	233	1	1	2	1	1	4	5	5	0	0	1	0	0	0	0	0	0	0	0	2	5	4	1	6	4	4	1	5	1	5	4	1	6	6	6	1	5	5	2	6	1	10	10	1	10	10	1	1
397	796	1	1	1	1	2	4	5	5	0	0	1	0	0	0	0	1	1	1	0	1	6	4	2	5	6	5	1	5	2	4	6	6	1	6	6	1	6	6	1	6	1	10	10	1	10	10	1	1
581	197	1	1	1	1	2	5	5	4	0	0	1	0	0	1	0	0	1	1	0	1	6	5	1	6	6	4	1	5	1	5	6	1	6	6	1	6	6	1	6	6	1	10	10	1	10	10	1	1
70	258	1	2	2	1	1	5	5	4	1	0	1	0	0	0	0	0	0	1	0	1	6	4	3	4	5	4	4	2	1	5	5	3	4	6	3	4	6	5	2	5	1	10	9	2	9	10	1	1
88	208	2	1	2	2	5	5	5	4	0	0	1	1	0	0	0	0	0	0	0	1	6	5	2	5	6	1	1	5	1	5	6	4	3	4	2	5	5	3	4	4	1	10	7	4	10	10	1	2
89	489	1	1	2	1	1	5	5	4	0	0	1	0	0	0	0	0	1	0	0	3	4	3	3	4	6	3	4	2	1	5	5	6	1	6	4	3	6	6	1	5	1	10	6	5	8	10	1	1
103	276	1	2	2	2	4	5	5	4	0	0	1	0	0	0	0	0	0	0	0	3	4	4	5	2	5	4	1	5	2	4	5	4	3	5	1	6	5	4	3	5	1	10	6	5	8	10	1	1
446	267	1	2	2	1	1	5	5	4	1	0	0	0	0	1	0	0	0	0	0	2	5	4	3	4	4	2	4	2	2	4	4	4	3	4	5	2	4	4	3	4	1	10	5	6	5	6	1	1
50	115	1	1	2	2	1	5	5	5	1	0	0	1	0	0	0	1	1	0	0	1	6	5	1	6	1	4	4	2	4	2	4	4	3	3	3	4	3	4	3	4	7	4	7	4	7	10	2	1
479	188	1	1	1	1	1	5	5	5	1	1	1	1	1	1	1	1	1	1	0	3	4	4	4	3	5	4	4	2	3	3	4	4	3	4	4	3	4	4	3	4	5	6	8	3	7	7	2	2
467	194	1	1	1	1	1	5	5	5	0	0	0	0	0	1	0	0	0	0	0	1	6	5	1	6	6	5	1	5	1	5	6	1	6	6	2	5	5	2	5	5	1	10	10	1	10	10	1	1
165	287	1	1	3	1	2	5	5	5	0	0	1	1	0	0	0	1	0	0	0	1	6	5	2	5	6	5	2	4	3	3	5	1	6	4	2	5	5	2	5	5	1	10	10	1	10	10	1	1
42	325	1	1	2	2	1	5	5	5	0	0	0	0	0	0	0	0	0	0	1	1	6	5	3	4	6	5	1	5	1	5	6	4	3	6	3	4	6	3	4	3	1	10	10	1	10	10	1	1
433	411	1	1	2	1	2	5	5	5	1	1	0	1	1	0	0	1	0	1	0	4	3	5	2	5	5	3	2	4	1	5	6	3	4	3	2	5	5	2	5	5	1	10	10	1	8	10	1	1
344	181	1	1	2	1	1	5	5	5	0	1	1	0	0	0	0	0	1	1	0	1	6	5	1	6	6	5	1	5	1	5	6	1	6	1	1	6	6	1	6	6	1	10	7	4	10	10	1	1
19	292	1	1	1	1	6	5	5	5	1	1	1	1	1	1	1	1	1	1	1	6	1	1	1	6	2	1	1	5	5	1	6	6	1	6	6	1	6	6	1	6	1	10	1	10	1	1	4	2
[truncated: 73 more columns]
